# Supplementary material for: Identification, Characterization, and Expression Profile Analysis of the mTERF Gene Family and Its Role in the Response to Abiotic Stress in Barley (Hordeum vulgare L.)
Source: Front Plant Sci. 2021 Jul 15;12:684619. doi: 10.3389/fpls.2021.684619 (PMC8319850; doi:10.3389/fpls.2021.684619)
Supplement: Supplementary Table 1 — Accession number and samples information of RNA-seq data used in this study. [file Data_Sheet_1.xlsx]

## Sheet: Table S1
Table S1. Accession number and samples information of RNA-seq data used in this study.
Type	Accession number	Tissue/Treatment	Description
Developmental stage	ERR1457197	Grain, bracts removed	15DPA, replicate 1, batch 1
	ERR1457172		15DPA, replicate 1, batch 2
	ERR1457198		15DPA, replicate 2, batch 1
	ERR1457173		15DPA, replicate 2, batch 2
	ERR1457199		15DPA, replicate 4, batch 1
	ERR1457174		15DPA, replicate 4, batch 2
	ERR1457188	Grain, bracts removed	5DPA, replicate 2, batch 1
	ERR1457163		5DPA, replicate 2, batch 2
	ERR1457189		5DPA, replicate 3, batch 1
	ERR1457164		5DPA, replicate 3, batch 2
	ERR1457190		5DPA, replicate 4, batch 1
	ERR1457165		5DPA, replicate 4, batch 2
	ERR1457191	Embryos	4d dissected from germinating grains, replicate 1, batch 1
	ERR1457166		4d dissected from germinating grains, replicate 1, batch 2
	ERR1457192		4d dissected from germinating grains, replicate 2, batch 1
	ERR1457167		4d dissected from germinating grains, replicate 2, batch 2
	ERR1457193		4d dissected from germinating grains, replicate 3, batch 1
	ERR1457168		4d dissected from germinating grains, replicate 3, batch 2
	ERR1457224	Epidermis	4 weeks, replicate1, batch1
	ERR1457248		4 weeks, replicate1, batch2
	ERR1457225		4 weeks, replicate2, batch1
	ERR1457249		4 weeks, replicate2, batch2
	ERR1457226		4 weeks, replicate3, batch1
	ERR1457250		4 weeks, replicate3, batch2
	ERR1457212	Etiolated	10 day old seedling, replicate 1, batch 1
	ERR1457236		10 day old seedling, replicate 1, batch 2
	ERR1457213		10 day old seedling, replicate 2, batch 1
	ERR1457237		10 day old seedling, replicate 2, batch 2
	ERR1457214		10 day old seedling, replicate 3, batch 1
	ERR1457238		10 day old seedling, replicate 3, batch 2
	ERR1457209	Young Inflorescences	5mm, replicate 1, batch 1
	ERR1457184		5mm, replicate 1, batch 2
	ERR1457210		5mm, replicate 2, batch 1
	ERR1457185		5mm, replicate 2, batch 2
	ERR1457211		5mm, replicate 3, batch 1
	ERR1457186		5mm, replicate 3, batch 2
	ERR1457203	Inflorescences	1-1.5cm, replicate 1, batch 1
	ERR1457178		1-1.5cm, replicate 1, batch 2
	ERR1457204		1-1.5cm, replicate 2, batch 1
	ERR1457179		1-1.5cm, replicate 2, batch 2
	ERR1457205		1-1.5cm, replicate 3, batch 1
	ERR1457180		1-1.5cm, replicate 3, batch 2
	ERR1457200	Shoot from the seedlings	10cm shoot stage, replicate 1, batch 1
	ERR1457175		10cm shoot stage, replicate 1, batch 2
	ERR1457201		10cm shoot stage, replicate 2, batch 1
	ERR1457176		10cm shoot stage, replicate 2, batch 2
	ERR1457202		10cm shoot stage, replicate 3, batch 1
	ERR1457177		10cm shoot stage, replicate 3, batch 2
	ERR1457215	Lemma	6 weeks PA, replicate 1, batch 1
	ERR1457239		6 weeks PA, replicate 1, batch 2
	ERR1457216		6 weeks PA, replicate 2, batch 1
	ERR1457240		6 weeks PA, replicate 2, batch 2
	ERR1457217		6 weeks PA, replicate 3, batch 1
	ERR1457241		6 weeks PA, replicate 3, batch 2
	ERR1457218	Lodicule	6 weeks PA, replicate 1, batch 1
	ERR1457242		6 weeks PA, replicate 1, batch 2
	ERR1457219		6 weeks PA, replicate 2, batch 1
	ERR1457243		6 weeks PA, replicate 2, batch 2
	ERR1457220		6 weeks PA, replicate 3, batch 1
	ERR1457244		6 weeks PA, replicate 3, batch 2
	ERR1457206	Developing tillers	six leaf stage, replicate 1, batch 1
	ERR1457181		six leaf stage, replicate 1, batch 2
	ERR1457207		six leaf stage, replicate 2, batch 1
	ERR1457182		six leaf stage, replicate 2, batch 2
	ERR1457187		six leaf stage, replicate 2, batch 2
	ERR1457208		six leaf stage, replicate 3, batch 1
	ERR1457183		six leaf stage, replicate 3, batch 2
	ERR1457221	Palea	6 weeks PA, replicate 1, batch 1
	ERR1457245		6 weeks PA, replicate 1, batch 2
	ERR1457222		6 weeks PA, replicate 2, batch 1
	ERR1457246		6 weeks PA, replicate 2, batch 2
	ERR1457223		6 weeks PA, replicate 3, batch 1
	ERR1457247		6 weeks PA, replicate 3, batch 2
	ERR1457227	Rachis	5 weeks PA, replicate 1, batch 1
	ERR1457251		5 weeks PA, replicate 1, batch 2
	ERR1457228		5 weeks PA, replicate 2, batch 1
	ERR1457252		5 weeks PA, replicate 2, batch 2
	ERR1457229		5 weeks PA, replicate 3, batch 1
	ERR1457253		5 weeks PA, replicate 3, batch 2
	ERR1457230	Root	4 weeks, replicate 1, batch 1
	ERR1457254		4 weeks, replicate 1, batch 2
	ERR1457231		4 weeks, replicate 2, batch 1
	ERR1457255		4 weeks, replicate 2, batch 2
	ERR1457232		4 weeks, replicate 3, batch 1
	ERR1457256		4 weeks, replicate 3, batch 2
	ERR1457194	Roots from the seedlings	10cm shoot stage, replicate 1, batch 1
	ERR1457169		10cm shoot stage, replicate 1, batch 2
	ERR1457195		10cm shoot stage, replicate 2, batch 1
	ERR1457170		10cm shoot stage, replicate 2, batch 2
	ERR1457196		10cm shoot stage, replicate 3, batch 1
	ERR1457171		10cm shoot stage, replicate 3, batch 2
	ERR1457233	Senescing leaf	2 months, replicate 1,batch 1
	ERR1457257		2 months, replicate 1,batch 2
	ERR1457234		2 months, replicate 2,batch 1
	ERR1457258		2 months, replicate 2,batch 2
	ERR1457235		2 months, replicate 3,batch 1
	ERR1457259		2 months, replicate 3,batch 2
Biotic/Abiotic stresses	ERR1366270	Salt	CK, Root meristematic zone, replicate 2
	ERR1366274		CK, Root meristematic zone, replicate 3
	ERR1366278		CK, Root meristematic zone, replicate 4
	ERR1366282		CK, Root elongation zone, replicate 1
	ERR1366286		CK, Root elongation zone, replicate 2
	ERR1366290		CK, Root elongation zone, replicate 3
	ERR1366294		CK, Root elongation zone, replicate 4
	ERR1366298		CK, Root maturation zone, replicate 1
	ERR1366302		CK, Root maturation zone, replicate 2
	ERR1366306		CK, Root maturation zone, replicate 3
	ERR1366310		CK, Root maturation zone, replicate 4
	ERR1366314		100mM NaCl, Root meristematic zone, replicate 1
	ERR1366318		100mM NaCl, Root meristematic zone, replicate 2
	ERR1366322		100mM NaCl, Root meristematic zone, replicate 3
	ERR1366326		100mM NaCl, Root meristematic zone, replicate 4
	ERR1366330		100mM NaCl, Root elongation zone, replicate 1
	ERR1366334		100mM NaCl, Root elongation zone, replicate 2
	ERR1366338		100mM NaCl, Root elongation zone, replicate 3
	ERR1366342		100mM NaCl, Root elongation zone, replicate 4
	ERR1366346		100mM NaCl, Root maturation zone, replicate 1
	ERR1366350		100mM NaCl, Root maturation zone, replicate 2
	ERR1366354		100mM NaCl, Root maturation zone, replicate 3
	ERR1366358		100mM NaCl, Root maturation zone, replicate 4
	ERR1744565	Cold	17 ℃, mix individual, 12 day length, replicate 1
	ERR1744566		17 ℃, mix individual, 12 day length, replicate 1
	ERR1744567		6 ℃, single individual, 8 day length, replicate 2
	ERR1744568		6 ℃, single individual, 8 day length, replicate 3
	ERR1744569		6 ℃, single individual, 8 day length, replicate 4
	ERR1744570		6 ℃, mix individual, 8 day length, replicate 1
	ERR1744571		6 ℃, single individual, 8 day length, replicate 1
	ERR1744572		6 ℃, single individual, 8 day length, replicate 2
	ERR1744573		6 ℃, single individual, 8 day length, replicate 3
	ERR1744574		6 ℃, mix individual, 8 day length, replicate 1
	SRR5452107	Cd	CK, 7 days root, replicate 1
	SRR5452105		CK, 7 days root, replicate 2
	SRR5452103		CK, 7 days root, replicate 3
	SRR5452101		80 µM Cd, 7 days root, replicate 1
	SRR5452099		80 µM Cd, 7 days root, replicate 2
	SRR5452097		80 µM Cd, 7 days root, replicate 3
	SRR5452131	Cu	CK, 7 days root, replicate 1
	SRR5452129		CK, 7 days root, replicate 2
	SRR5452127		CK, 7 days root, replicate 3
	SRR5452125		50 µM Cu, 7 days root, replicate 1
	SRR5452123		50 µM Cu, 7 days root, replicate 2
	SRR5452121		50 µM Cu, 7 days root, replicate 3
	SRR5452119	Zn	CK, 7 days root, replicate 1
	SRR5452117		CK, 7 days root, replicate 2
	SRR5452115		CK, 7 days root, replicate 3
	SRR5452113		570 µM Zn, 7 days root, replicate 1
	SRR5452111		570 µM Zn, 7 days root, replicate 2
	SRR5452109		570 µM Zn, 7 days root, replicate 3

## Sheet: Table S2
Table S2. The primers used in the qRT-PCR.
HvbHLHs	Forward primer (5'-3')	Reverse primer (5'-3')
HvmTERF2	GAGTCCAGCATTTTGGTCAGC	GACCATCTTGCTCACCTGAGAC
HvmTERF3	CTGTTAAGAGGGACTCATGGCTG	CGGACCTTCTTTTGTATGCTCTC
HvmTERF8	CTGTGGTGTTAGGAGAGACTGG	TCATAGACCATAGTGCCGAAGTCAT
HvmTERF9	ATCGTTGCTGGTGAGGTCCAAG	CTGTACGTGAGCATTGCTGGAC
HvmTERF12	ACATCGCGTTCCTTCAAGAGTG	CATGCCTAAACATTCCAGAGCC
HvmTERF16	GCGCTATTCTACTACAGCATTGACG	AGAAGTACTCCGGGAAGTCGAAGAG
HvmTERF17	CTTGCGCTGCAGATCTGTCGT	GTGTGTGAGGAGGTTGCAGTTG
HvmTERF19	CCAACATCGACAAGGTGGTACAG	CTCTGGTTTGGTGCTGAGCAG
HvmTERF21	CCTCTTCACCTTCAACGTGGAG	TCGAGGCTGAAGGTGAAGTACTG
HvmTERF23	ACTGTTTTCAAGGAGACTGAGAAGT	CAGCATAATCTTCAGCAAGGTGTG
HvmTERF24	CTCAGTACGCAAGTAGGATCCACAG	ATGAGGTGAGTATCTCCTTGCACTC
HvmTERF25	GTCTCCAAGCTAGACTACTTGCTGC	GAGCTTGACATTGGGCTTGACCAC
HvmTERF27	GTGGTATGCGCTGAAGGTCTAG	CCTTAGACAATTCCAGTACCGTCG
HvmTERF28	TCATTGCCAAGCTGTGCATCACT	CGTACCTGAACATCCTGGATTGAC
HvmTERF29	CAAACCGACCGATAATGCTCACT	AGCATCAGCGTAGTCTTCAGC
HvmTERF43	CAGACCCAGGTACTATGTTATCAAG	CTCCATAAATACTTTGTCGCTCAG
HvmTERF45	ACCGAGTTCCCACACTACTTCG	GCTCGTGAGCATTTCCTTTAGTGAC
HvmTERF46	GAAAGGTTTGAGAAGTGCGGTAG	CACTTCAACCAAATTATCCCCATG
HvmTERF49	GAAGTTCATCCACATCCTCAGCC	ACGCACATCTTGACAATGTCGT
HvmTERF51	AGGAGACGGTCAAACCAAATGT	AGAAGTACTGCTGTGCCGCTAG
HvmTERF52	CCTCCTAAGGCGTGACATTGAC	CTTTTCTGGGCTGCAGACGATC
HvmTERF53	GCTTTGGTGCACATTGACAAGT	CTCCGATTTTGTCGGTGAGCT
HvmTERF58	CATGATCGGCAAGATCCTGACC	CATGATGACCCTCTGGAGATACG
HvmTERF59	ACACATTAGGGTCGAAAGTCAGC	AGAGCCTTCAACAAATCCTATGCT
HvmTERF60	CCGTTACTCTGGGATGTTCAGG	GAGATTCGGGGCTTTAGACACG
HvActin	CAGGTATCGCTGACCGTATGAG	TGGAAAGTGCTGAGTGAGGCT

## Sheet: Table S3
Table S3. Summary information of the 220 wild barley and landraces accessions.
Accession number	Sample	Longitude	Latitude	Type
ERR753347	100-HS8	-7.5	30.5	landrace
ERR753340	93-HS1	-7.5	30.5	landrace
ERR753345	94-HS2	-7.5	30.5	landrace
ERR753346	95-HS3	-7.5	30.5	landrace
ERR753221	BCC003	65.75	34.6333	landrace
ERR753262	BCC103	36.2667	32.1167	landrace
ERR753263	BCC105	35.8333	31.2833	landrace
ERR753261	BCC107	36.1	33.9333	landrace
ERR753322	BCC108	35.7333	34.3333	landrace
ERR753220	BCC126	-5.79	31.37	landrace
ERR753209	BCC131	-3.05	32.05	landrace
ERR753205	BCC1481	34.35	61.7833	landrace
ERR753211	BCC1487	47.5019	42.975	landrace
ERR753226	BCC1488	142.64	51	landrace
ERR753228	BCC1494	57.1814	50.2981	landrace
ERR753227	BCC1503	58.3836	37.9417	landrace
ERR753231	BCC1589	12.7333	37.9333	landrace
ERR753222	BCC167	57.3333	22.6667	landrace
ERR753243	BCC168	57.6667	23.1667	landrace
ERR753309	BCC169	57.25	25.6667	landrace
ERR753223	BCC182	73.3667	36.3	landrace
ERR753092	BCC185	46.7167	24.6333	landrace
ERR753206	BCC190	40.0722	36.8333	landrace
ERR753210	BCC192	38.9597	36.3833	landrace
ERR753212	BCC195	36.5442	33.8167	landrace
ERR753224	BCC197	36.4631	36.1167	landrace
ERR753258	BCC21	30.71	28.3119	landrace
ERR753256	BCC42	-1.25	34.2167	landrace
ERR753260	BCC51	34.4833	30.5667	landrace
ERR753318	BCC54	32.5167	30.8167	landrace
ERR753225	BCC761	83.7361	28.3561	landrace
ERR753145	FT037	34.473	31.4012	spontaneum
ERR753146	FT045	35.4367	31.6729	spontaneum
ERR753147	FT067	34.8904	31.5373	spontaneum
ERR753094	FT011	35.3048	31.8347	spontaneum
ERR753148	FT144	34.6796	30.5718	spontaneum
ERR753149	FT147	34.7444	30.8454	spontaneum
ERR753150	FT172	35.7307	33.2294	spontaneum
ERR753151	FT175	35.6455	33.2511	spontaneum
ERR753330	FT018	35.3994	32.0687	spontaneum
ERR753097	FT218	35.1129	31.772	spontaneum
ERR753152	FT219	35.7635	33.2872	spontaneum
ERR753298	FT222	35.4239	32.9743	spontaneum
ERR753214	FT226	35.2236	31.7792	landrace
ERR753153	FT229	44.15	36.4	spontaneum
ERR753154	FT232	41.65	36.4167	spontaneum
ERR753296	FT248	48.5792	31.6759	spontaneum
ERR753155	FT252	44.4833	37.25	spontaneum
ERR753331	FT262	37.2833	36.7808	spontaneum
ERR753156	FT268	38.8814	35.1672	spontaneum
ERR753157	FT270	36.8361	33.6542	spontaneum
ERR753158	FT272	36.05	32.2167	spontaneum
ERR753159	FT276	35.6667	32.5833	spontaneum
ERR753334	FT279	69	35.75	spontaneum
ERR753160	FT286	50.8333	30.0667	spontaneum
ERR753095	FT031	34.5851	31.6983	spontaneum
ERR753161	FT332	48.1833	33.8167	spontaneum
ERR753335	FT333	59.483	35.983	spontaneum
ERR753162	FT338	35.4167	33	spontaneum
ERR753163	FT340	34.7	31.5	spontaneum
ERR753165	FT359	-6.83	34.02	landrace
ERR753166	FT361	28.1667	36.4	spontaneum
ERR753167	FT363	34.0167	34.9833	spontaneum
ERR753168	FT376	62.3417	35.2758	spontaneum
ERR753341	FT380	27.2333	31.35	landrace
ERR753344	FT388	91.1	29.65	landrace
ERR753297	FT389	101.15	30.97	spontaneum
ERR753343	FT390	91.1	29.65	landrace
ERR753170	FT393	35.4453	32.7426	spontaneum
ERR753234	FT411	7.85111	46.3136	landrace
ERR753235	FT414	44.21	15.36	landrace
ERR753096	FT042	34.6315	30.89	spontaneum
ERR753098	FT462	39.78	37.7783	spontaneum
ERR753099	FT473	37.7867	37.6583	spontaneum
ERR753173	FT507	43.4167	36.3833	spontaneum
ERR753174	FT512	35.8208	35.6056	spontaneum
ERR753208	FT519	112	31	landrace
ERR753239	FT520	75.2808	42.8186	landrace
ERR753240	FT521	2.68333	42.7333	landrace
ERR753241	FT523	60.15	41.6	landrace
ERR753237	FT524	126.4	39.5	landrace
ERR753325	FT525	37.9903	37.0294	landrace
ERR753238	FT539	44.2833	37.5717	landrace
ERR753254	FT549	35.8	31.7167	landrace
ERR753253	FT553	35.2333	31.7667	landrace
ERR753255	FT554	68.6667	37.3333	landrace
ERR753259	FT555	41.1667	39.1833	landrace
ERR753329	FT056	35.6603	32.7805	spontaneum
ERR753257	FT561	80.9167	29.25	landrace
ERR753175	FT566	56.683	38.417	spontaneum
ERR753176	FT567	61.8833	41.05	spontaneum
ERR753177	FT568	63.183	34.5	spontaneum
ERR753178	FT572	35.633	30.667	spontaneum
ERR753179	FT578	43.1	40.65	spontaneum
ERR753180	FT581	41.7167	37.9667	spontaneum
ERR753196	FT582	42.0989	37.0925	spontaneum
ERR753187	FT584	40.4975	36.9669	spontaneum
ERR753204	FT589	37.0069	35.0289	spontaneum
ERR753203	FT590	36.7025	35.0133	spontaneum
ERR753181	FT592	41.0856	37.0738	spontaneum
ERR753185	FT595	42.1667	36.3333	spontaneum
ERR753184	FT604	43.1667	36.0833	spontaneum
ERR753183	FT611	51.25	35.5	spontaneum
ERR753182	FT613	49.83	32.55	spontaneum
ERR753342	FT616	48.2578	32.1892	spontaneum
ERR753198	FT627	35.9	32.0167	spontaneum
ERR753194	FT628	36.3789	32.5964	spontaneum
ERR753265	FT630	35.8667	33.4667	spontaneum
ERR753266	FT631	36.1	33.9333	spontaneum
ERR753267	FT632	42.0706	37.0778	spontaneum
ERR753333	FT064	35.1233	31.347	spontaneum
ERR753338	FT643	35.4373	31.6733	spontaneum
ERR753268	FT657	52.5247	29.6081	spontaneum
ERR753269	FT658	43.2	35.3667	spontaneum
ERR753270	FT660	45.7	36.75	spontaneum
ERR753271	FT661	47.2	38.5	spontaneum
ERR753337	FT670	36.9322	36.9922	spontaneum
ERR753288	FT671	35.9167	33.8333	spontaneum
ERR753100	FT730	37.2747	37.3294	spontaneum
ERR753279	FT731	37.2814	37.4239	spontaneum
ERR753278	FT733	36.4672	36.2558	spontaneum
ERR753289	FT734	38.7786	37.4103	spontaneum
ERR753272	FT735	39.955	37.7919	spontaneum
ERR753287	FT741	41.4525	37.6814	spontaneum
ERR753290	FT746	36.7281	36.9786	spontaneum
ERR753291	FT747	36.9519	36.8661	spontaneum
ERR753277	FT748	37.7347	37.315	spontaneum
ERR753332	FT075	34.8881	31.4374	spontaneum
ERR753285	FT754	40.0006	36.95	spontaneum
ERR753284	FT871	67.6932	40.0711	spontaneum
ERR753336	FT873	66.625	38.3111	spontaneum
ERR753281	FT875	67.4358	38.0753	spontaneum
ERR753280	FT878	46.0192	34.4427	spontaneum
ERR753282	FT885	68.6135	38.624	spontaneum
ERR753339	FT886	69.2394	38.3422	spontaneum
ERR753142	HOR10103	13.9181	25.9161	landrace
ERR753143	HOR10130	9.50028	30.1328	landrace
ERR753216	HOR10152	14.8831	26.2258	landrace
ERR753125	HOR10280	13.5333	26.8031	landrace
ERR753136	HOR10350	36.47	8.15	landrace
ERR753138	HOR10360	42.7167	43.05	landrace
ERR753126	HOR10410	21.3317	52.4061	landrace
ERR753273	HOR10551	13.7522	37.5786	landrace
ERR753117	HOR10609	43.2569	36.1664	landrace
ERR753107	HOR10610	43.2567	36.4433	landrace
ERR753286	HOR10627	42	34.8333	landrace
ERR753139	HOR10705	44.7289	42.1772	landrace
ERR753109	HOR10761	38.2333	5.63333	landrace
ERR753118	HOR10782	13.8825	41.9017	landrace
ERR753310	HOR11317	35.1871	31.7156	landrace
ERR753137	HOR1133	2.21361	46.2167	landrace
ERR753207	HOR11403	77.167	31.1	landrace
ERR753189	HOR1192	29.0061	38.2928	landrace
ERR753264	HOR12762	67.9	38.2833	landrace
ERR753236	HOR12830	38.0865	36.7014	landrace
ERR753144	HOR13416	-8.83333	31.05	landrace
ERR753244	HOR14153	18.7919	12.0428	landrace
ERR753245	HOR14279	39.4292	14.6983	landrace
ERR753192	HOR1431	71.14	34.86	landrace
ERR753218	HOR1463	71.31	35.91	landrace
ERR753308	HOR154	73.0833	31.4167	landrace
ERR753103	HOR1707	71.52	35.91	landrace
ERR753119	HOR1758	71.1504	35	landrace
ERR753229	HOR1804	71.15	35	landrace
ERR753230	HOR1842	72.38	36.27	landrace
ERR753132	HOR203	36.4872	50.0992	landrace
ERR753305	HOR2351	113.65	34.765	landrace
ERR753320	HOR2458	91.1	29.65	landrace
ERR753326	HOR2465	91.1	29.65	landrace
ERR753274	HOR2766	23.31	24.05	landrace
ERR753191	HOR2777	47.8	37.6333	landrace
ERR753111	HOR2785	51.8667	35.6	landrace
ERR753112	HOR2792	50.85	30.5167	landrace
ERR753232	HOR2800	48.8167	31.5333	landrace
ERR753113	HOR2808	50.85	33.5667	landrace
ERR753233	HOR2829	48.8167	34.5833	landrace
ERR753121	HOR2854	46.7833	38.65	landrace
ERR753114	HOR2867	58.9833	37.6333	landrace
ERR753106	HOR354	9.11667	47.9833	landrace
ERR753133	HOR383	25.9586	43.8544	landrace
ERR753202	HOR3938	-16.78	28.21	landrace
ERR753102	HOR3950	13.1667	47.0064	landrace
ERR753123	HOR3959	12.6447	47.2722	landrace
ERR753134	HOR396	27.7669	42.3144	landrace
ERR753120	HOR4150	3.21667	36.7	landrace
ERR753129	HOR4469	36.0333	32.685	landrace
ERR753200	HOR454	27.9167	40.65	landrace
ERR753283	HOR4720	23.7139	56.6483	landrace
ERR753101	HOR4724	44.5167	40.1833	landrace
ERR753193	HOR5702	36.8333	7.66667	landrace
ERR753219	HOR6360	36.8833	7.46667	landrace
ERR753140	HOR713	22.1833	37.6667	landrace
ERR753135	HOR7380	18.8322	49.5197	landrace
ERR753190	HOR742	18.4167	43.8667	landrace
ERR753201	HOR7436	18.8928	49.3572	landrace
ERR753122	HOR752	21.8242	39.0742	landrace
ERR753124	HOR756	20.1892	40.7878	landrace
ERR753324	HOR758	21.4522	42.0036	landrace
ERR753131	HOR7969	37	38	landrace
ERR753213	HOR8113	29.5	39.25	landrace
ERR753116	HOR8455	47.8167	30.5	landrace
ERR753128	HOR8635	22.1411	48.5281	landrace
ERR753104	HOR8658	29.9042	31.1933	landrace
ERR753195	HOR8826	20.9592	49.4214	landrace
ERR753217	HOR8827	20.6	49.6333	landrace
ERR753199	HOR8842	-6.75333	37.5733	landrace
ERR753130	HOR902	36.3311	41.2928	landrace
ERR753110	HOR937	21.8242	39.0742	landrace
ERR753127	HOR9453	23.5997	46.7772	landrace
ERR753108	HOR9607	43.35	42.3	landrace
ERR753115	HOR9827	13.9833	32.7667	landrace
ERR753141	HOR9888	22.6392	32.7636	landrace
ERR753105	HOR9919	6.30569	45.4322	landrace
ERR753306	SBCC002	-2.67	42.85	landrace
ERR753321	SBCC003	-3.15	40.63	landrace
ERR753323	SBCC014	-5.07	37.53	landrace
ERR753315	SBCC095	-6.85	40.98	landrace
ERR753307	SBCC144	-17.81	28.8	landrace
ERR753317	SBCC147	-4.77	43.07	landrace
ERR753312	SBCC158	1.52	41.98	landrace

## Sheet: Table S4
Table S4. Characteristic features of mTERF gene family in Barley.
No.	mTERF names	Barley gene ID	Start	End	Chromosome location	Amino acid length	EST	pI	Mw(kD)	Subcellular location	GRAVY
1	HvmTERF1	HORVU.MOREX.r2.1HG0015280.1	67112357	67114195	chr1H	612	7	9.41	69.182	Mitochondrion	-0.318
2	HvmTERF2	HORVU.MOREX.r2.1HG0050120.1	420029478	420030971	chr1H	497	6	5.41	55.7845	Chloroplast	-0.139
3	HvmTERF3	HORVU.MOREX.r2.1HG0050340.1	420380170	420381357	chr1H	395	6	9.67	43.7512	Mitochondrion	0.101
4	HvmTERF4	HORVU.MOREX.r2.1HG0052970.1	436264991	436266124	chr1H	377	4	9.38	41.6568	Mitochondrion	0.163
5	HvmTERF5	HORVU.MOREX.r2.1HG0055250.1	448870939	448872111	chr1H	390	3	9.87	43.4308	Mitochondrion	0.041
6	HvmTERF6	HORVU.MOREX.r2.2HG0097270.1	60877616	60878122	chr2H	168	1	9.22	19.1264	Other	-0.095
7	HvmTERF7	HORVU.MOREX.r2.2HG0108120.1	137979819	137983250	chr2H	497	5	9.19	57.2847	Chloroplast	-0.502
8	HvmTERF8	HORVU.MOREX.r2.2HG0126950.1	367255469	367260178	chr2H	604	8	9.17	68.2461	Chloroplast	-0.144
9	HvmTERF9	HORVU.MOREX.r2.2HG0156430.1	602566691	602567833	chr2H	380	2	9.35	41.5524	Mitochondrion	0.058
10	HvmTERF10	HORVU.MOREX.r2.2HG0171950.1	650298999	650300141	chr2H	380	5	10.78	41.9568	Mitochondrion	0.124
11	HvmTERF11	HORVU.MOREX.r2.3HG0191280.1	23033262	23034419	chr3H	385	2	9.58	42.2415	Mitochondrion	0.155
12	HvmTERF12	HORVU.MOREX.r2.3HG0200770.1	82127192	82128346	chr3H	384	1	9.68	42.1636	Mitochondrion	0.083
13	HvmTERF13	HORVU.MOREX.r2.3HG0208960.1	159806678	159808516	chr3H	612	7	9.44	69.0579	Mitochondrion	-0.312
14	HvmTERF14	HORVU.MOREX.r2.4HG0286270.1	45657504	45658478	chr4H	324	0	9.53	36.9056	Mitochondrion	-0.336
15	HvmTERF15	HORVU.MOREX.r2.4HG0289010.1	69204517	69205677	chr4H	386	2	9.71	42.5352	Mitochondrion	0.153
16	HvmTERF16	HORVU.MOREX.r2.4HG0311790.1	359732798	359733739	chr4H	313	14	9.49	34.594	Other	-0.104
17	HvmTERF17	HORVU.MOREX.r2.4HG0335080.1	574692741	574693868	chr4H	375	0	9.48	41.4295	Mitochondrion	0.078
18	HvmTERF18	HORVU.MOREX.r2.5HG0393580.1	405735033	405735494	chr5H	153	3	6.97	17.5822	Other	-0.31
19	HvmTERF19	HORVU.MOREX.r2.5HG0403640.1	471359260	471360417	chr5H	385	1	9.51	42.1815	Mitochondrion	0.162
20	HvmTERF20	HORVU.MOREX.r2.5HG0420050.1	525376744	525380247	chr5H	585	1	9.38	65.1147	Chloroplast	0.062
21	HvmTERF21	HORVU.MOREX.r2.5HG0429250.1	550924292	550925275	chr5H	327	9	8.71	35.6504	Chloroplast	0.057
22	HvmTERF22	HORVU.MOREX.r2.5HG0434340.1	564160234	564161415	chr5H	393	1	9.48	43.0153	Mitochondrion	0.207
23	HvmTERF23	HORVU.MOREX.r2.5HG0435870.1	569335341	569335880	chr5H	179	3	8.54	20.3517	Other	-0.17
24	HvmTERF24	HORVU.MOREX.r2.5HG0441670.1	584492953	584494951	chr5H	323	13	9.26	35.5908	Other	-0.486
25	HvmTERF25	HORVU.MOREX.r2.6HG0450160.1	7335214	7336383	chr6H	389	4	9.54	41.8702	Mitochondrion	0.259
26	HvmTERF26	HORVU.MOREX.r2.6HG0450170.1	7340384	7340890	chr6H	168	0	9.46	18.903	Other	-0.149
27	HvmTERF27	HORVU.MOREX.r2.6HG0450300.1	7797789	7798946	chr6H	385	4	9.51	41.8388	Mitochondrion	0.171
28	HvmTERF28	HORVU.MOREX.r2.6HG0450310.1	7819561	7820715	chr6H	384	6	9.58	42.3404	Mitochondrion	0.191
29	HvmTERF29	HORVU.MOREX.r2.6HG0450450.1	7946661	7951070	chr6H	381	3	9.18	41.2432	Mitochondrion	0.199
30	HvmTERF30	HORVU.MOREX.r2.6HG0450460.1	7952399	7952860	chr6H	153	3	9.25	17.5273	Mitochondrion	-0.267
31	HvmTERF31	HORVU.MOREX.r2.6HG0450500.1	7983585	7984733	chr6H	382	1	9.88	41.9969	Mitochondrion	0.127
32	HvmTERF32	HORVU.MOREX.r2.6HG0450510.1	7988174	7989352	chr6H	392	4	9.44	42.6155	Chloroplast	0.033
33	HvmTERF33	HORVU.MOREX.r2.6HG0450550.1	8033730	8034872	chr6H	380	2	9.65	41.9842	Mitochondrion	0.093
34	HvmTERF34	HORVU.MOREX.r2.6HG0450560.1	8039159	8040340	chr6H	393	4	9.81	43.5578	Mitochondrion	-0.018
35	HvmTERF35	HORVU.MOREX.r2.6HG0450610.1	8099334	8099873	chr6H	179	3	9.3	20.4396	Other	-0.296
36	HvmTERF36	HORVU.MOREX.r2.6HG0451860.1	11895666	11896838	chr6H	390	1	9.45	42.95	Mitochondrion	0.026
37	HvmTERF37	HORVU.MOREX.r2.6HG0451880.1	11904842	11906005	chr6H	387	1	9.33	42.9729	Mitochondrion	0.053
38	HvmTERF38	HORVU.MOREX.r2.6HG0451890.1	11908401	11909570	chr6H	389	0	9.41	42.792	Mitochondrion	0.092
39	HvmTERF39	HORVU.MOREX.r2.6HG0451900.1	11922386	11923546	chr6H	386	0	9.53	42.4596	Mitochondrion	0.073
40	HvmTERF40	HORVU.MOREX.r2.6HG0451970.1	12025329	12026162	chr6H	277	0	8.94	31.1042	Mitochondrion	0.047
41	HvmTERF41	HORVU.MOREX.r2.6HG0451990.1	12087498	12087815	chr6H	105	1	9.51	12.0132	Other	-0.185
42	HvmTERF42	HORVU.MOREX.r2.6HG0452030.1	12144390	12145532	chr6H	380	1	9.53	41.4258	Mitochondrion	0.144
43	HvmTERF43	HORVU.MOREX.r2.6HG0452040.1	12148258	12149412	chr6H	384	0	9.98	42.1645	Mitochondrion	0.089
44	HvmTERF44	HORVU.MOREX.r2.6HG0483120.1	239382903	239383619	chr6H	133	0	8.68	15.3608	Other	-0.272
45	HvmTERF45	HORVU.MOREX.r2.6HG0487890.1	312272572	312273414	chr6H	280	4	9.91	30.7321	Other	0.111
46	HvmTERF46	HORVU.MOREX.r2.6HG0490870.1	345738770	345742148	chr6H	485	0	9.21	54.7574	Chloroplast	-0.143
47	HvmTERF47	HORVU.MOREX.r2.6HG0503310.1	470248944	470250659	chr6H	571	9	7.2	64.3277	Mitochondrion	-0.025
48	HvmTERF48	HORVU.MOREX.r2.6HG0507320.1	498055205	498055546	chr6H	113	1	8.61	13.2154	Other	-0.278
49	HvmTERF49	HORVU.MOREX.r2.6HG0509710.1	512532223	512533374	chr6H	383	4	9.75	42.7061	Mitochondrion	0.038
50	HvmTERF50	HORVU.MOREX.r2.6HG0509730.1	512551068	512552264	chr6H	398	3	9.38	43.7883	Chloroplast	0.131
51	HvmTERF51	HORVU.MOREX.r2.6HG0515770.1	542368585	542370060	chr6H	491	0	8.72	54.9733	Mitochondrion	0.043
52	HvmTERF52	HORVU.MOREX.r2.7HG0552280.1	85382461	85383633	chr7H	390	7	9.4	42.2743	Mitochondrion	0.096
53	HvmTERF53	HORVU.MOREX.r2.7HG0552300.1	85442385	85443554	chr7H	389	2	9.77	42.8353	Mitochondrion	0.14
54	HvmTERF54	HORVU.MOREX.r2.7HG0552360.1	85722035	85723174	chr7H	379	7	9.38	42.0354	Mitochondrion	0.12
55	HvmTERF55	HORVU.MOREX.r2.7HG0552430.1	85835867	85837048	chr7H	393	0	9.47	34.7024	Mitochondrion	0.137
56	HvmTERF56	HORVU.MOREX.r2.7HG0555200.1	105320857	105321315	chr7H	152	1	9.46	17.5626	Other	-0.084
57	HvmTERF57	HORVU.MOREX.r2.7HG0564510.1	177249726	177251621	chr7H	631	0	9.25	71.0715	Mitochondrion	0.011
58	HvmTERF58	HORVU.MOREX.r2.7HG0565320.1	184503772	184504773	chr7H	333	16	9.49	37.6685	Other	-0.086
59	HvmTERF59	HORVU.MOREX.r2.7HG0566160.1	189973008	189974906	chr7H	632	2	9.3	71.8196	Mitochondrion	-0.195
60	HvmTERF60	HORVU.MOREX.r2.7HG0589680.1	470634578	470635741	chr7H	387	4	9.44	42.7138	Mitochondrion	0.041

## Sheet: Table S5
Table S5. Verification of the mTERF domain using the NCBI-CDD, SMART, HMMER and InterPro databases.
Gene Name	CDD										Interpro											SMART				HMMER
	Hit type	PSSM-ID	From	To	E-Value	Bitscore	Accession	Short name	Incomplete	Superfamily	Length	Source database	Accession	Name	Start	End	E-Value	Accession	Description	Ontology term	Pathway	Name	Start	End	E-value	Family id	Family Accession	Clan	Env. Start	Env. End	Ali. Start	Ali. End	Model Start	Model End	Bit Score	Ind. E-value	Cond. E-value	Description
HvmTERF1	superfamily	418649	220	571	8.53898e-19	87.6511	cl19765	mTERF superfamily	-	-	612	Pfam	PF02536	mTERF	435	571	7.2e-11	IPR003690	Transcription termination factor, mitochondrial/chloroplastic	GO:0003690|GO:0006355	Reactome: R-DME-163316|Reactome: R-DME-5205685|Reactome: R-HSA-163316|Reactome: R-HSA-2151201|Reactome: R-HSA-5205685|Reactome: R-HSA-6793080|Reactome: R-MMU-163316|Reactome: R-MMU-5205685|Reactome: R-RNO-163316|Reactome: R-RNO-5205685	mTERF	489	520	7.78	mTERF	PF02536.14	-	220	433	220	417	1	209	50.99	9.8e-14	5.4e-18	mTERF
HvmTERF2	specific	215628	41	471	0	731.126	PLN03196	PLN03196	-	cl19765	497	Pfam	PF02536	mTERF	143	450	1.4e-100	IPR003690	Transcription termination factor, mitochondrial/chloroplastic	GO:0003690|GO:0006355	Reactome: R-DME-163316|Reactome: R-DME-5205685|Reactome: R-HSA-163316|Reactome: R-HSA-2151201|Reactome: R-HSA-5205685|Reactome: R-HSA-6793080|Reactome: R-MMU-163316|Reactome: R-MMU-5205685|Reactome: R-RNO-163316|Reactome: R-RNO-5205685	mTERF	265	296	7.84e-05	mTERF	PF02536.14	-	143	451	143	450	1	313	338.03	4.1e-101	2.3e-105	mTERF
HvmTERF3	superfamily	418649	98	336	6.52239e-22	94.9699	cl19765	mTERF superfamily	-	-	395	Pfam	PF02536	mTERF	165	359	2.2e-20	IPR003690	Transcription termination factor, mitochondrial/chloroplastic	GO:0003690|GO:0006355	Reactome: R-DME-163316|Reactome: R-DME-5205685|Reactome: R-HSA-163316|Reactome: R-HSA-2151201|Reactome: R-HSA-5205685|Reactome: R-HSA-6793080|Reactome: R-MMU-163316|Reactome: R-MMU-5205685|Reactome: R-RNO-163316|Reactome: R-RNO-5205685	mTERF	110	141	0.737	mTERF	PF02536.14	-	164	367	178	359	123	306	71.86	4.3e-20	2.4e-24	mTERF
HvmTERF4	superfamily	418649	71	311	1.29527e-26	107.682	cl19765	mTERF superfamily	-	-	377	Pfam	PF02536	mTERF	71	269	1.1e-22	IPR003690	Transcription termination factor, mitochondrial/chloroplastic	GO:0003690|GO:0006355	Reactome: R-DME-163316|Reactome: R-DME-5205685|Reactome: R-HSA-163316|Reactome: R-HSA-2151201|Reactome: R-HSA-5205685|Reactome: R-HSA-6793080|Reactome: R-MMU-163316|Reactome: R-MMU-5205685|Reactome: R-RNO-163316|Reactome: R-RNO-5205685	mTERF	85	116	0.0265	mTERF	PF02536.14	-	71	269	71	269	1	170	79.76	1.7e-22	9.5e-27	mTERF
HvmTERF5	superfamily	418649	85	343	1.06877e-18	85.7251	cl19765	mTERF superfamily	-	-	390	Pfam	PF02536	mTERF	260	351	2.4e-09	IPR003690	Transcription termination factor, mitochondrial/chloroplastic	GO:0003690|GO:0006355	Reactome: R-DME-163316|Reactome: R-DME-5205685|Reactome: R-HSA-163316|Reactome: R-HSA-2151201|Reactome: R-HSA-5205685|Reactome: R-HSA-6793080|Reactome: R-MMU-163316|Reactome: R-MMU-5205685|Reactome: R-RNO-163316|Reactome: R-RNO-5205685	mTERF	99	131	0.0699	mTERF	PF02536.14	-	73	360	76	351	28	304	75.77	2.8e-21	1.6e-25	mTERF
HvmTERF6	superfamily	418649	27	134	2.83822e-09	54.524	cl19765	mTERF superfamily	N	-	168	Pfam	PF02536	mTERF	27	134	2.5e-12	IPR003690	Transcription termination factor, mitochondrial/chloroplastic	GO:0003690|GO:0006355	Reactome: R-DME-163316|Reactome: R-DME-5205685|Reactome: R-HSA-163316|Reactome: R-HSA-2151201|Reactome: R-HSA-5205685|Reactome: R-HSA-6793080|Reactome: R-MMU-163316|Reactome: R-MMU-5205685|Reactome: R-RNO-163316|Reactome: R-RNO-5205685	mTERF	51	82	0.599	mTERF	PF02536.14	-	12	135	27	134	211	313	46.3	2.6e-12	1.5e-16	mTERF
HvmTERF7	superfamily	418649	185	460	1.57767e-41	150.824	cl19765	mTERF superfamily	-	-	497	Pfam	PF02536	mTERF	250	460	2.5e-39	IPR003690	Transcription termination factor, mitochondrial/chloroplastic	GO:0003690|GO:0006355	Reactome: R-DME-163316|Reactome: R-DME-5205685|Reactome: R-HSA-163316|Reactome: R-HSA-2151201|Reactome: R-HSA-5205685|Reactome: R-HSA-6793080|Reactome: R-MMU-163316|Reactome: R-MMU-5205685|Reactome: R-RNO-163316|Reactome: R-RNO-5205685	mTERF	343	374	2.66e-07	mTERF	PF02536.14	-	248	461	250	460	104	313	134.83	2.9e-39	1.6e-43	mTERF
HvmTERF8	superfamily	418649	253	559	1.06817e-62	209.374	cl19765	mTERF superfamily	-	-	604	Pfam	PF02536	mTERF	281	559	1e-59	IPR003690	Transcription termination factor, mitochondrial/chloroplastic	GO:0003690|GO:0006355	Reactome: R-DME-163316|Reactome: R-DME-5205685|Reactome: R-HSA-163316|Reactome: R-HSA-2151201|Reactome: R-HSA-5205685|Reactome: R-HSA-6793080|Reactome: R-MMU-163316|Reactome: R-MMU-5205685|Reactome: R-RNO-163316|Reactome: R-RNO-5205685	mTERF	336	367	0.00134	mTERF	PF02536.14	-	279	559	281	559	32	314	202.84	5.8e-60	3.2e-64	mTERF
HvmTERF9	superfamily	418649	75	329	8.81611e-21	91.5031	cl19765	mTERF superfamily	-	-	380	Pfam	PF02536	mTERF	162	332	2.4e-20	IPR003690	Transcription termination factor, mitochondrial/chloroplastic	GO:0003690|GO:0006355	Reactome: R-DME-163316|Reactome: R-DME-5205685|Reactome: R-HSA-163316|Reactome: R-HSA-2151201|Reactome: R-HSA-5205685|Reactome: R-HSA-6793080|Reactome: R-MMU-163316|Reactome: R-MMU-5205685|Reactome: R-RNO-163316|Reactome: R-RNO-5205685	mTERF	295	329	0.395	mTERF	PF02536.14	-	101	347	102	332	100	299	82.52	2.5e-23	1.4e-27	mTERF
HvmTERF10	superfamily	418649	77	335	7.03015e-11	62.6132	cl19765	mTERF superfamily	-	-	380	Pfam	PF02536	mTERF	259	335	2.7e-12	IPR003690	Transcription termination factor, mitochondrial/chloroplastic	GO:0003690|GO:0006355	Reactome: R-DME-163316|Reactome: R-DME-5205685|Reactome: R-HSA-163316|Reactome: R-HSA-2151201|Reactome: R-HSA-5205685|Reactome: R-HSA-6793080|Reactome: R-MMU-163316|Reactome: R-MMU-5205685|Reactome: R-RNO-163316|Reactome: R-RNO-5205685	mTERF	301	335	1.95	mTERF	PF02536.14	-	246	352	259	335	224	297	46.21	2.8e-12	1.6e-16	mTERF
HvmTERF11	superfamily	418649	79	326	9.24766e-21	91.5031	cl19765	mTERF superfamily	-	-	385	Pfam	PF02536	mTERF	78	333	1.4e-23	IPR003690	Transcription termination factor, mitochondrial/chloroplastic	GO:0003690|GO:0006355	Reactome: R-DME-163316|Reactome: R-DME-5205685|Reactome: R-HSA-163316|Reactome: R-HSA-2151201|Reactome: R-HSA-5205685|Reactome: R-HSA-6793080|Reactome: R-MMU-163316|Reactome: R-MMU-5205685|Reactome: R-RNO-163316|Reactome: R-RNO-5205685	mTERF	300	334	0.279	mTERF	PF02536.14	-	76	351	78	333	36	296	83.64	1.1e-23	6.3e-28	mTERF
HvmTERF12	superfamily	418649	75	350	1.0692e-14	74.1691	cl19765	mTERF superfamily	-	-	384	Pfam	PF02536	mTERF	243	350	3e-08	IPR003690	Transcription termination factor, mitochondrial/chloroplastic	GO:0003690|GO:0006355	Reactome: R-DME-163316|Reactome: R-DME-5205685|Reactome: R-HSA-163316|Reactome: R-HSA-2151201|Reactome: R-HSA-5205685|Reactome: R-HSA-6793080|Reactome: R-MMU-163316|Reactome: R-MMU-5205685|Reactome: R-RNO-163316|Reactome: R-RNO-5205685	mTERF	299	333	1.04	mTERF	PF02536.14	-	232	351	243	350	211	313	32.92	3.1e-08	1.7e-12	mTERF
HvmTERF13	superfamily	418649	220	571	2.94851e-18	85.7251	cl19765	mTERF superfamily	-	-	612	Pfam	PF02536	mTERF	220	417	4.7e-14	IPR003690	Transcription termination factor, mitochondrial/chloroplastic	GO:0003690|GO:0006355	Reactome: R-DME-163316|Reactome: R-DME-5205685|Reactome: R-HSA-163316|Reactome: R-HSA-2151201|Reactome: R-HSA-5205685|Reactome: R-HSA-6793080|Reactome: R-MMU-163316|Reactome: R-MMU-5205685|Reactome: R-RNO-163316|Reactome: R-RNO-5205685	mTERF	489	520	7.78	mTERF	PF02536.14	-	220	432	220	417	1	209	51.95	5e-14	2.8e-18	mTERF
HvmTERF14	superfamily	418649	165	237	6.97669e-11	62.228	cl19765	mTERF superfamily	N	-	324	Pfam	PF02536	mTERF	163	238	1.8e-13	IPR003690	Transcription termination factor, mitochondrial/chloroplastic	GO:0003690|GO:0006355	Reactome: R-DME-163316|Reactome: R-DME-5205685|Reactome: R-HSA-163316|Reactome: R-HSA-2151201|Reactome: R-HSA-5205685|Reactome: R-HSA-6793080|Reactome: R-MMU-163316|Reactome: R-MMU-5205685|Reactome: R-RNO-163316|Reactome: R-RNO-5205685	mTERF	180	211	0.13	mTERF	PF02536.14	-	155	263	163	238	217	292	50.02	1.9e-13	1.1e-17	mTERF
HvmTERF15	superfamily	418649	77	334	3.51736e-24	101.133	cl19765	mTERF superfamily	-	-	386	Pfam	PF02536	mTERF	69	334	6.9e-26	IPR003690	Transcription termination factor, mitochondrial/chloroplastic	GO:0003690|GO:0006355	Reactome: R-DME-163316|Reactome: R-DME-5205685|Reactome: R-HSA-163316|Reactome: R-HSA-2151201|Reactome: R-HSA-5205685|Reactome: R-HSA-6793080|Reactome: R-MMU-163316|Reactome: R-MMU-5205685|Reactome: R-RNO-163316|Reactome: R-RNO-5205685	mTERF	266	297	0.688	mTERF	PF02536.14	-	46	349	69	334	29	298	90.72	7.9e-26	4.4e-30	mTERF
HvmTERF16	superfamily	418649	73	261	4.19922e-24	99.5923	cl19765	mTERF superfamily	N	-	313	Pfam	PF02536	mTERF	151	260	9.8e-20	IPR003690	Transcription termination factor, mitochondrial/chloroplastic	GO:0003690|GO:0006355	Reactome: R-DME-163316|Reactome: R-DME-5205685|Reactome: R-HSA-163316|Reactome: R-HSA-2151201|Reactome: R-HSA-5205685|Reactome: R-HSA-6793080|Reactome: R-MMU-163316|Reactome: R-MMU-5205685|Reactome: R-RNO-163316|Reactome: R-RNO-5205685	mTERF	182	214	0.00177	mTERF	PF02536.14	-	148	261	151	260	204	313	70.77	9.3e-20	5.2e-24	mTERF
HvmTERF17	superfamily	418649	74	316	5.56091e-13	68.7764	cl19765	mTERF superfamily	-	-	375	Pfam	PF02536	mTERF	53	339	2.2e-23	IPR003690	Transcription termination factor, mitochondrial/chloroplastic	GO:0003690|GO:0006355	Reactome: R-DME-163316|Reactome: R-DME-5205685|Reactome: R-HSA-163316|Reactome: R-HSA-2151201|Reactome: R-HSA-5205685|Reactome: R-HSA-6793080|Reactome: R-MMU-163316|Reactome: R-MMU-5205685|Reactome: R-RNO-163316|Reactome: R-RNO-5205685	mTERF	88	119	0.847	mTERF	PF02536.14	-	43	342	53	338	16	310	83.32	1.4e-23	7.9e-28	mTERF
HvmTERF18	superfamily	418649	12	119	2.65603e-10	56.8352	cl19765	mTERF superfamily	N	-	153	Pfam	PF02536	mTERF	12	119	3.9e-13	IPR003690	Transcription termination factor, mitochondrial/chloroplastic	GO:0003690|GO:0006355	Reactome: R-DME-163316|Reactome: R-DME-5205685|Reactome: R-HSA-163316|Reactome: R-HSA-2151201|Reactome: R-HSA-5205685|Reactome: R-HSA-6793080|Reactome: R-MMU-163316|Reactome: R-MMU-5205685|Reactome: R-RNO-163316|Reactome: R-RNO-5205685	mTERF	68	102	4.17	mTERF	PF02536.14	-	6	120	12	119	211	313	49.03	3.9e-13	2.2e-17	mTERF
HvmTERF19	superfamily	418649	55	351	5.08212e-15	74.9395	cl19765	mTERF superfamily	-	-	385	Pfam	PF02536	mTERF	77	345	6e-21	IPR003690	Transcription termination factor, mitochondrial/chloroplastic	GO:0003690|GO:0006355	Reactome: R-DME-163316|Reactome: R-DME-5205685|Reactome: R-HSA-163316|Reactome: R-HSA-2151201|Reactome: R-HSA-5205685|Reactome: R-HSA-6793080|Reactome: R-MMU-163316|Reactome: R-MMU-5205685|Reactome: R-RNO-163316|Reactome: R-RNO-5205685	mTERF	162	193	0.0201	mTERF	PF02536.14	-	43	352	77	345	34	306	74.9	5.2e-21	2.9e-25	mTERF
HvmTERF20	specific	396885	270	577	1.53667e-136	399.663	pfam02536	mTERF	-	cl19765	585	Pfam	PF02536	mTERF	270	577	2.3e-105	IPR003690	Transcription termination factor, mitochondrial/chloroplastic	GO:0003690|GO:0006355	Reactome: R-DME-163316|Reactome: R-DME-5205685|Reactome: R-HSA-163316|Reactome: R-HSA-2151201|Reactome: R-HSA-5205685|Reactome: R-HSA-6793080|Reactome: R-MMU-163316|Reactome: R-MMU-5205685|Reactome: R-RNO-163316|Reactome: R-RNO-5205685	mTERF	426	457	5.54e-05	mTERF	PF02536.14	-	270	577	270	577	1	314	350.86	5.1e-105	2.8e-109	mTERF
HvmTERF21	superfamily	418649	89	317	1.37494e-39	141.579	cl19765	mTERF superfamily	-	-	327	Pfam	PF02536	mTERF	210	317	9.9e-27	IPR003690	Transcription termination factor, mitochondrial/chloroplastic	GO:0003690|GO:0006355	Reactome: R-DME-163316|Reactome: R-DME-5205685|Reactome: R-HSA-163316|Reactome: R-HSA-2151201|Reactome: R-HSA-5205685|Reactome: R-HSA-6793080|Reactome: R-MMU-163316|Reactome: R-MMU-5205685|Reactome: R-RNO-163316|Reactome: R-RNO-5205685	mTERF	169	200	0.000146	mTERF	PF02536.14	-	204	318	210	317	206	313	93.66	1e-26	5.6e-31	mTERF
HvmTERF22	superfamily	418649	88	332	7.85658e-17	80.3323	cl19765	mTERF superfamily	-	-	393	Pfam	PF02536	mTERF	90	359	1.5e-20	IPR003690	Transcription termination factor, mitochondrial/chloroplastic	GO:0003690|GO:0006355	Reactome: R-DME-163316|Reactome: R-DME-5205685|Reactome: R-HSA-163316|Reactome: R-HSA-2151201|Reactome: R-HSA-5205685|Reactome: R-HSA-6793080|Reactome: R-MMU-163316|Reactome: R-MMU-5205685|Reactome: R-RNO-163316|Reactome: R-RNO-5205685	mTERF	308	342	14.5	mTERF	PF02536.14	-	77	360	88	359	34	313	74.77	5.6e-21	3.1e-25	mTERF
HvmTERF23	superfamily	418649	38	120	2.2844e-10	57.9908	cl19765	mTERF superfamily	N	-	179	Pfam	PF02536	mTERF	37	145	4.7e-14	IPR003690	Transcription termination factor, mitochondrial/chloroplastic	GO:0003690|GO:0006355	Reactome: R-DME-163316|Reactome: R-DME-5205685|Reactome: R-HSA-163316|Reactome: R-HSA-2151201|Reactome: R-HSA-5205685|Reactome: R-HSA-6793080|Reactome: R-MMU-163316|Reactome: R-MMU-5205685|Reactome: R-RNO-163316|Reactome: R-RNO-5205685	mTERF	94	128	0.369	mTERF	PF02536.14	-	4	146	37	145	210	313	51.91	5.1e-14	2.9e-18	mTERF
HvmTERF24	superfamily	418649	242	315	9.6423e-08	53.1743	cl19765	mTERF superfamily	NC	-	323	Pfam	PF02536	mTERF	241	304	2.9e-06	IPR003690	Transcription termination factor, mitochondrial/chloroplastic	GO:0003690|GO:0006355	Reactome: R-DME-163316|Reactome: R-DME-5205685|Reactome: R-HSA-163316|Reactome: R-HSA-2151201|Reactome: R-HSA-5205685|Reactome: R-HSA-6793080|Reactome: R-MMU-163316|Reactome: R-MMU-5205685|Reactome: R-RNO-163316|Reactome: R-RNO-5205685	mTERF	-	-	-	mTERF	PF02536.14	-	227	310	241	304	150	211	26.48	2.8e-06	1.6e-10	mTERF
HvmTERF25	superfamily	418649	82	355	2.35135e-16	78.7915	cl19765	mTERF superfamily	-	-	389	Pfam	PF02536	mTERF	165	355	2.7e-17	IPR003690	Transcription termination factor, mitochondrial/chloroplastic	GO:0003690|GO:0006355	Reactome: R-DME-163316|Reactome: R-DME-5205685|Reactome: R-HSA-163316|Reactome: R-HSA-2151201|Reactome: R-HSA-5205685|Reactome: R-HSA-6793080|Reactome: R-MMU-163316|Reactome: R-MMU-5205685|Reactome: R-RNO-163316|Reactome: R-RNO-5205685	mTERF	96	127	0.642	mTERF	PF02536.14	-	148	356	165	355	123	313	62.78	2.5e-17	1.4e-21	mTERF
HvmTERF26	superfamily	418649	28	117	9.74433e-09	52.9832	cl19765	mTERF superfamily	N	-	168	Pfam	PF02536	mTERF	21	134	3.2e-11	IPR003690	Transcription termination factor, mitochondrial/chloroplastic	GO:0003690|GO:0006355	Reactome: R-DME-163316|Reactome: R-DME-5205685|Reactome: R-HSA-163316|Reactome: R-HSA-2151201|Reactome: R-HSA-5205685|Reactome: R-HSA-6793080|Reactome: R-MMU-163316|Reactome: R-MMU-5205685|Reactome: R-RNO-163316|Reactome: R-RNO-5205685	mTERF	15	46	121	mTERF	PF02536.14	-	7	135	21	134	205	313	42.75	3.2e-11	1.8e-15	mTERF
HvmTERF27	superfamily	418649	80	326	2.78105e-17	81.4879	cl19765	mTERF superfamily	-	-	385	Pfam	PF02536	mTERF	80	281	6.5e-13	IPR003690	Transcription termination factor, mitochondrial/chloroplastic	GO:0003690|GO:0006355	Reactome: R-DME-163316|Reactome: R-DME-5205685|Reactome: R-HSA-163316|Reactome: R-HSA-2151201|Reactome: R-HSA-5205685|Reactome: R-HSA-6793080|Reactome: R-MMU-163316|Reactome: R-MMU-5205685|Reactome: R-RNO-163316|Reactome: R-RNO-5205685	mTERF	94	125	6.78	mTERF	PF02536.14	-	80	282	80	281	1	212	48.94	4.1e-13	2.3e-17	mTERF
HvmTERF28	superfamily	418649	78	325	2.69558e-24	101.518	cl19765	mTERF superfamily	-	-	384	Pfam	PF02536	mTERF	60	348	3.7e-26	IPR003690	Transcription termination factor, mitochondrial/chloroplastic	GO:0003690|GO:0006355	Reactome: R-DME-163316|Reactome: R-DME-5205685|Reactome: R-HSA-163316|Reactome: R-HSA-2151201|Reactome: R-HSA-5205685|Reactome: R-HSA-6793080|Reactome: R-MMU-163316|Reactome: R-MMU-5205685|Reactome: R-RNO-163316|Reactome: R-RNO-5205685	mTERF	92	123	0.0529	mTERF	PF02536.14	-	56	351	58	348	17	311	93.38	1.2e-26	6.8e-31	mTERF
HvmTERF29	superfamily	418649	74	330	3.96333e-16	78.0211	cl19765	mTERF superfamily	-	-	381	Pfam	PF02536	mTERF	152	329	1.8e-14	IPR003690	Transcription termination factor, mitochondrial/chloroplastic	GO:0003690|GO:0006355	Reactome: R-DME-163316|Reactome: R-DME-5205685|Reactome: R-HSA-163316|Reactome: R-HSA-2151201|Reactome: R-HSA-5205685|Reactome: R-HSA-6793080|Reactome: R-MMU-163316|Reactome: R-MMU-5205685|Reactome: R-RNO-163316|Reactome: R-RNO-5205685	mTERF	296	330	0.344	mTERF	PF02536.14	-	136	347	152	329	118	296	53.65	1.5e-14	8.5e-19	mTERF
HvmTERF30	superfamily	418649	12	119	7.93994e-07	47.2052	cl19765	mTERF superfamily	N	-	153	Pfam	PF02536	mTERF	12	119	1.6e-10	IPR003690	Transcription termination factor, mitochondrial/chloroplastic	GO:0003690|GO:0006355	Reactome: R-DME-163316|Reactome: R-DME-5205685|Reactome: R-HSA-163316|Reactome: R-HSA-2151201|Reactome: R-HSA-5205685|Reactome: R-HSA-6793080|Reactome: R-MMU-163316|Reactome: R-MMU-5205685|Reactome: R-RNO-163316|Reactome: R-RNO-5205685	mTERF	36	67	15.6	mTERF	PF02536.14	-	6	120	12	119	211	313	40.42	1.6e-10	9e-15	mTERF
HvmTERF31	superfamily	418649	76	348	1.04461e-20	91.5031	cl19765	mTERF superfamily	-	-	382	Pfam	PF02536	mTERF	63	348	1.2e-25	IPR003690	Transcription termination factor, mitochondrial/chloroplastic	GO:0003690|GO:0006355	Reactome: R-DME-163316|Reactome: R-DME-5205685|Reactome: R-HSA-163316|Reactome: R-HSA-2151201|Reactome: R-HSA-5205685|Reactome: R-HSA-6793080|Reactome: R-MMU-163316|Reactome: R-MMU-5205685|Reactome: R-RNO-163316|Reactome: R-RNO-5205685	mTERF	159	190	0.212	mTERF	PF02536.14	-	55	349	63	348	24	313	90.24	1.1e-25	6.1e-30	mTERF
HvmTERF32	superfamily	418649	79	352	7.70412e-25	103.059	cl19765	mTERF superfamily	-	-	392	Pfam	PF02536	mTERF	143	352	1.4e-21	IPR003690	Transcription termination factor, mitochondrial/chloroplastic	GO:0003690|GO:0006355	Reactome: R-DME-163316|Reactome: R-DME-5205685|Reactome: R-HSA-163316|Reactome: R-HSA-2151201|Reactome: R-HSA-5205685|Reactome: R-HSA-6793080|Reactome: R-MMU-163316|Reactome: R-MMU-5205685|Reactome: R-RNO-163316|Reactome: R-RNO-5205685	mTERF	93	124	0.0108	mTERF	PF02536.14	-	133	353	143	352	103	313	77.24	1e-21	5.6e-26	mTERF
HvmTERF33	superfamily	418649	74	347	1.23231e-18	85.3399	cl19765	mTERF superfamily	-	-	380	Pfam	PF02536	mTERF	154	347	5.5e-19	IPR003690	Transcription termination factor, mitochondrial/chloroplastic	GO:0003690|GO:0006355	Reactome: R-DME-163316|Reactome: R-DME-5205685|Reactome: R-HSA-163316|Reactome: R-HSA-2151201|Reactome: R-HSA-5205685|Reactome: R-HSA-6793080|Reactome: R-MMU-163316|Reactome: R-MMU-5205685|Reactome: R-RNO-163316|Reactome: R-RNO-5205685	mTERF	88	119	0.13	mTERF	PF02536.14	-	134	347	154	347	120	314	68.21	5.6e-19	3.1e-23	mTERF
HvmTERF34	superfamily	418649	57	328	1.02979e-21	94.5847	cl19765	mTERF superfamily	-	-	393	Pfam	PF02536	mTERF	58	332	8e-28	IPR003690	Transcription termination factor, mitochondrial/chloroplastic	GO:0003690|GO:0006355	Reactome: R-DME-163316|Reactome: R-DME-5205685|Reactome: R-HSA-163316|Reactome: R-HSA-2151201|Reactome: R-HSA-5205685|Reactome: R-HSA-6793080|Reactome: R-MMU-163316|Reactome: R-MMU-5205685|Reactome: R-RNO-163316|Reactome: R-RNO-5205685	mTERF	93	124	0.279	mTERF	PF02536.14	-	48	350	58	332	16	293	97.72	5.8e-28	3.2e-32	mTERF
HvmTERF35	superfamily	418649	38	120	4.32565e-09	54.1388	cl19765	mTERF superfamily	N	-	179	Pfam	PF02536	mTERF	38	127	1.4e-11	IPR003690	Transcription termination factor, mitochondrial/chloroplastic	GO:0003690|GO:0006355	Reactome: R-DME-163316|Reactome: R-DME-5205685|Reactome: R-HSA-163316|Reactome: R-HSA-2151201|Reactome: R-HSA-5205685|Reactome: R-HSA-6793080|Reactome: R-MMU-163316|Reactome: R-MMU-5205685|Reactome: R-RNO-163316|Reactome: R-RNO-5205685	mTERF	94	128	2.09	mTERF	PF02536.14	-	2	140	38	127	211	296	43.91	1.4e-11	7.8e-16	mTERF
HvmTERF36	superfamily	418649	105	331	1.33518e-15	76.8655	cl19765	mTERF superfamily	-	-	390	Pfam	PF02536	mTERF	166	356	4.1e-19	IPR003690	Transcription termination factor, mitochondrial/chloroplastic	GO:0003690|GO:0006355	Reactome: R-DME-163316|Reactome: R-DME-5205685|Reactome: R-HSA-163316|Reactome: R-HSA-2151201|Reactome: R-HSA-5205685|Reactome: R-HSA-6793080|Reactome: R-MMU-163316|Reactome: R-MMU-5205685|Reactome: R-RNO-163316|Reactome: R-RNO-5205685	mTERF	305	339	0.00662	mTERF	PF02536.14	-	141	357	166	356	122	313	68.82	3.6e-19	2e-23	mTERF
HvmTERF37	superfamily	418649	81	353	2.72135e-15	75.7099	cl19765	mTERF superfamily	-	-	387	Pfam	PF02536	mTERF	166	353	3.7e-16	IPR003690	Transcription termination factor, mitochondrial/chloroplastic	GO:0003690|GO:0006355	Reactome: R-DME-163316|Reactome: R-DME-5205685|Reactome: R-HSA-163316|Reactome: R-HSA-2151201|Reactome: R-HSA-5205685|Reactome: R-HSA-6793080|Reactome: R-MMU-163316|Reactome: R-MMU-5205685|Reactome: R-RNO-163316|Reactome: R-RNO-5205685	mTERF	164	195	0.261	mTERF	PF02536.14	-	142	354	165	353	124	313	58.92	3.8e-16	2.1e-20	mTERF
HvmTERF38	superfamily	418649	104	330	2.82026e-18	84.5695	cl19765	mTERF superfamily	-	-	389	Pfam	PF02536	mTERF	164	338	3.8e-17	IPR003690	Transcription termination factor, mitochondrial/chloroplastic	GO:0003690|GO:0006355	Reactome: R-DME-163316|Reactome: R-DME-5205685|Reactome: R-HSA-163316|Reactome: R-HSA-2151201|Reactome: R-HSA-5205685|Reactome: R-HSA-6793080|Reactome: R-MMU-163316|Reactome: R-MMU-5205685|Reactome: R-RNO-163316|Reactome: R-RNO-5205685	mTERF	166	197	0.0988	mTERF	PF02536.14	-	82	356	83	338	37	297	73.71	1.2e-20	6.6e-25	mTERF
HvmTERF39	superfamily	418649	101	327	1.94261e-15	76.0951	cl19765	mTERF superfamily	-	-	386	Pfam	PF02536	mTERF	77	352	2.8e-25	IPR003690	Transcription termination factor, mitochondrial/chloroplastic	GO:0003690|GO:0006355	Reactome: R-DME-163316|Reactome: R-DME-5205685|Reactome: R-HSA-163316|Reactome: R-HSA-2151201|Reactome: R-HSA-5205685|Reactome: R-HSA-6793080|Reactome: R-MMU-163316|Reactome: R-MMU-5205685|Reactome: R-RNO-163316|Reactome: R-RNO-5205685	mTERF	163	194	0.00538	mTERF	PF02536.14	-	69	353	77	352	34	313	89	2.6e-25	1.5e-29	mTERF
HvmTERF40	superfamily	418649	55	243	3.17492e-15	74.1691	cl19765	mTERF superfamily	N	-	277	Pfam	PF02536	mTERF	55	243	1.5e-21	IPR003690	Transcription termination factor, mitochondrial/chloroplastic	GO:0003690|GO:0006355	Reactome: R-DME-163316|Reactome: R-DME-5205685|Reactome: R-HSA-163316|Reactome: R-HSA-2151201|Reactome: R-HSA-5205685|Reactome: R-HSA-6793080|Reactome: R-MMU-163316|Reactome: R-MMU-5205685|Reactome: R-RNO-163316|Reactome: R-RNO-5205685	mTERF	54	85	0.369	mTERF	PF02536.14	-	4	244	54	243	123	313	76.76	1.4e-21	7.8e-26	mTERF
HvmTERF41	superfamily	418649	6	51	0.00157773	36.0344	cl19765	mTERF superfamily	N	-	105	Pfam	PF02536	mTERF	2	76	1.4e-07	IPR003690	Transcription termination factor, mitochondrial/chloroplastic	GO:0003690|GO:0006355	Reactome: R-DME-163316|Reactome: R-DME-5205685|Reactome: R-HSA-163316|Reactome: R-HSA-2151201|Reactome: R-HSA-5205685|Reactome: R-HSA-6793080|Reactome: R-MMU-163316|Reactome: R-MMU-5205685|Reactome: R-RNO-163316|Reactome: R-RNO-5205685	mTERF	25	59	50.6	mTERF	PF02536.14	-	1	77	2	76	243	313	30.56	1.6e-07	9e-12	mTERF
HvmTERF42	superfamily	418649	100	326	1.1839e-14	73.7839	cl19765	mTERF superfamily	-	-	380	Pfam	PF02536	mTERF	78	351	3.4e-21	IPR003690	Transcription termination factor, mitochondrial/chloroplastic	GO:0003690|GO:0006355	Reactome: R-DME-163316|Reactome: R-DME-5205685|Reactome: R-HSA-163316|Reactome: R-HSA-2151201|Reactome: R-HSA-5205685|Reactome: R-HSA-6793080|Reactome: R-MMU-163316|Reactome: R-MMU-5205685|Reactome: R-RNO-163316|Reactome: R-RNO-5205685	mTERF	162	193	0.01	mTERF	PF02536.14	-	70	352	78	351	72	313	75.72	2.9e-21	1.6e-25	mTERF
HvmTERF43	superfamily	418649	78	333	4.99731e-12	66.08	cl19765	mTERF superfamily	-	-	384	Pfam	PF02536	mTERF	164	348	1.5e-14	IPR003690	Transcription termination factor, mitochondrial/chloroplastic	GO:0003690|GO:0006355	Reactome: R-DME-163316|Reactome: R-DME-5205685|Reactome: R-HSA-163316|Reactome: R-HSA-2151201|Reactome: R-HSA-5205685|Reactome: R-HSA-6793080|Reactome: R-MMU-163316|Reactome: R-MMU-5205685|Reactome: R-RNO-163316|Reactome: R-RNO-5205685	mTERF	299	333	0.369	mTERF	PF02536.14	-	159	351	164	348	126	311	53.82	1.3e-14	7.5e-19	mTERF
HvmTERF44	-	-	-	-	-	-	-	-	-	-	133	SMART	SM00733	mt_12	15	46	0.052	IPR003690	Transcription termination factor, mitochondrial/chloroplastic	GO:0003690|GO:0006355	Reactome: R-DME-163316|Reactome: R-DME-5205685|Reactome: R-HSA-163316|Reactome: R-HSA-2151201|Reactome: R-HSA-5205685|Reactome: R-HSA-6793080|Reactome: R-MMU-163316|Reactome: R-MMU-5205685|Reactome: R-RNO-163316|Reactome: R-RNO-5205685	mTERF	15	46	0.0608	mTERF	PF02536.14	-	56	100	58	99	276	313	10.45	0.21	1.2e-05	mTERF
HvmTERF45	superfamily	418649	184	265	3.51223e-18	82.6435	cl19765	mTERF superfamily	N	-	280	Pfam	PF02536	mTERF	115	265	1.5e-19	IPR003693	Transcription termination factor, mitochondrial/chloroplastic	GO:0003690|GO:0006355	Reactome: R-DME-163316|Reactome: R-DME-5205685|Reactome: R-HSA-163316|Reactome: R-HSA-2151201|Reactome: R-HSA-5205685|Reactome: R-HSA-6793080|Reactome: R-MMU-163316|Reactome: R-MMU-5205685|Reactome: R-RNO-163316|Reactome: R-RNO-5205685	mTERF	185	217	0.000146	mTERF	PF02536.14	-	109	265	115	265	165	314	70.06	1.5e-19	8.5e-24	mTERF
HvmTERF46	superfamily	418649	209	475	1.48833e-45	161.224	cl19765	mTERF superfamily	-	-	485	Pfam	PF02536	mTERF	310	475	8.2e-33	IPR003690	Transcription termination factor, mitochondrial/chloroplastic	GO:0003690|GO:0006355	Reactome: R-DME-163316|Reactome: R-DME-5205685|Reactome: R-HSA-163316|Reactome: R-HSA-2151201|Reactome: R-HSA-5205685|Reactome: R-HSA-6793080|Reactome: R-MMU-163316|Reactome: R-MMU-5205685|Reactome: R-RNO-163316|Reactome: R-RNO-5205685	mTERF	328	359	8.53e-06	mTERF	PF02536.14	-	308	475	309	475	145	314	114.74	3.9e-33	2.1e-37	mTERF
HvmTERF47	superfamily	418649	254	531	1.11562e-14	74.9395	cl19765	mTERF superfamily	-	-	571	Pfam	PF02536	mTERF	394	531	1.9e-14	IPR003690	Transcription termination factor, mitochondrial/chloroplastic	GO:0003690|GO:0006355	Reactome: R-DME-163316|Reactome: R-DME-5205685|Reactome: R-HSA-163316|Reactome: R-HSA-2151201|Reactome: R-HSA-5205685|Reactome: R-HSA-6793080|Reactome: R-MMU-163316|Reactome: R-MMU-5205685|Reactome: R-RNO-163316|Reactome: R-RNO-5205685	mTERF	448	479	0.973	mTERF	PF02536.14	-	389	532	394	531	177	313	53.45	1.7e-14	9.7e-19	mTERF
HvmTERF48	superfamily	418649	3	79	3.73118e-07	46.82	cl19765	mTERF superfamily	N	-	113	Pfam	PF02536	mTERF	3	79	3e-09	IPR003690	Transcription termination factor, mitochondrial/chloroplastic	GO:0003690|GO:0006355	Reactome: R-DME-163316|Reactome: R-DME-5205685|Reactome: R-HSA-163316|Reactome: R-HSA-2151201|Reactome: R-HSA-5205685|Reactome: R-HSA-6793080|Reactome: R-MMU-163316|Reactome: R-MMU-5205685|Reactome: R-RNO-163316|Reactome: R-RNO-5205685	mTERF	28	62	1.2	mTERF	PF02536.14	-	1	80	3	79	241	313	36.11	3.3e-09	1.8e-13	mTERF
HvmTERF49	superfamily	418649	88	333	2.07234e-22	96.1255	cl19765	mTERF superfamily	-	-	383	Pfam	PF02536	mTERF	67	352	3.6e-29	IPR003690	Transcription termination factor, mitochondrial/chloroplastic	GO:0003690|GO:0006355	Reactome: R-DME-163316|Reactome: R-DME-5205685|Reactome: R-HSA-163316|Reactome: R-HSA-2151201|Reactome: R-HSA-5205685|Reactome: R-HSA-6793080|Reactome: R-MMU-163316|Reactome: R-MMU-5205685|Reactome: R-RNO-163316|Reactome: R-RNO-5205685	mTERF	93	124	4.17	mTERF	PF02536.14	-	46	352	67	352	27	314	102.21	2.5e-29	1.4e-33	mTERF
HvmTERF50	superfamily	418649	94	367	1.09274e-13	71.0876	cl19765	mTERF superfamily	-	-	398	Pfam	PF02536	mTERF	92	366	7.9e-22	IPR003690	Transcription termination factor, mitochondrial/chloroplastic	GO:0003690|GO:0006355	Reactome: R-DME-163316|Reactome: R-DME-5205685|Reactome: R-HSA-163316|Reactome: R-HSA-2151201|Reactome: R-HSA-5205685|Reactome: R-HSA-6793080|Reactome: R-MMU-163316|Reactome: R-MMU-5205685|Reactome: R-RNO-163316|Reactome: R-RNO-5205685	mTERF	283	314	0.212	mTERF	PF02536.14	-	80	367	91	366	34	313	77.89	6.4e-22	3.5e-26	mTERF
HvmTERF51	specific	215628	37	491	0	745.763	PLN03196	PLN03196	-	cl19765	491	Pfam	PF02536	mTERF	131	440	1.2e-101	IPR003690	Transcription termination factor, mitochondrial/chloroplastic	GO:0003690|GO:0006355	Reactome: R-DME-163316|Reactome: R-DME-5205685|Reactome: R-HSA-163316|Reactome: R-HSA-2151201|Reactome: R-HSA-5205685|Reactome: R-HSA-6793080|Reactome: R-MMU-163316|Reactome: R-MMU-5205685|Reactome: R-RNO-163316|Reactome: R-RNO-5205685	mTERF	254	285	1.62e-06	mTERF	PF02536.14	-	131	440	131	440	1	314	345.38	2.4e-103	1.3e-107	mTERF
HvmTERF52	superfamily	418649	80	357	5.74474e-22	94.9699	cl19765	mTERF superfamily	-	-	390	Pfam	PF02536	mTERF	82	357	8e-23	IPR003690	Transcription termination factor, mitochondrial/chloroplastic	GO:0003690|GO:0006355	Reactome: R-DME-163316|Reactome: R-DME-5205685|Reactome: R-HSA-163316|Reactome: R-HSA-2151201|Reactome: R-HSA-5205685|Reactome: R-HSA-6793080|Reactome: R-MMU-163316|Reactome: R-MMU-5205685|Reactome: R-RNO-163316|Reactome: R-RNO-5205685	mTERF	276	307	0.043	mTERF	PF02536.14	-	80	358	82	357	36	313	81.1	6.7e-23	3.7e-27	mTERF
HvmTERF53	superfamily	418649	79	334	1.53453e-17	82.2583	cl19765	mTERF superfamily	-	-	389	Pfam	PF02536	mTERF	79	334	3.9e-23	IPR003690	Transcription termination factor, mitochondrial/chloroplastic	GO:0003690|GO:0006355	Reactome: R-DME-163316|Reactome: R-DME-5205685|Reactome: R-HSA-163316|Reactome: R-HSA-2151201|Reactome: R-HSA-5205685|Reactome: R-HSA-6793080|Reactome: R-MMU-163316|Reactome: R-MMU-5205685|Reactome: R-RNO-163316|Reactome: R-RNO-5205685	mTERF	96	127	0.0142	mTERF	PF02536.14	-	136	351	149	334	107	297	60.22	1.5e-16	8.5e-21	mTERF
HvmTERF54	superfamily	418649	73	347	1.28293e-07	52.598	cl19765	mTERF superfamily	-	-	379	Pfam	PF02536	mTERF	168	346	2.7e-12	IPR003690	Transcription termination factor, mitochondrial/chloroplastic	GO:0003690|GO:0006355	Reactome: R-DME-163316|Reactome: R-DME-5205685|Reactome: R-HSA-163316|Reactome: R-HSA-2151201|Reactome: R-HSA-5205685|Reactome: R-HSA-6793080|Reactome: R-MMU-163316|Reactome: R-MMU-5205685|Reactome: R-RNO-163316|Reactome: R-RNO-5205685	mTERF	91	122	0.973	mTERF	PF02536.14	-	157	347	168	346	131	313	46.41	2.4e-12	1.4e-16	mTERF
HvmTERF55	superfamily	418649	87	342	7.04711e-21	91.8883	cl19765	mTERF superfamily	-	-	393	Pfam	PF02536	mTERF	162	350	1e-19	IPR003690	Transcription termination factor, mitochondrial/chloroplastic	GO:0003690|GO:0006355	Reactome: R-DME-163316|Reactome: R-DME-5205685|Reactome: R-HSA-163316|Reactome: R-HSA-2151201|Reactome: R-HSA-5205685|Reactome: R-HSA-6793080|Reactome: R-MMU-163316|Reactome: R-MMU-5205685|Reactome: R-RNO-163316|Reactome: R-RNO-5205685	mTERF	308	342	0.0401	mTERF	PF02536.14	-	144	360	159	349	112	303	71.12	7.3e-20	4.1e-24	mTERF
HvmTERF56	superfamily	418649	7	101	2.27129e-08	51.4424	cl19765	mTERF superfamily	N	-	152	Pfam	PF02536	mTERF	10	101	1.6e-09	IPR003690	Transcription termination factor, mitochondrial/chloroplastic	GO:0003690|GO:0006355	Reactome: R-DME-163316|Reactome: R-DME-5205685|Reactome: R-HSA-163316|Reactome: R-HSA-2151201|Reactome: R-HSA-5205685|Reactome: R-HSA-6793080|Reactome: R-MMU-163316|Reactome: R-MMU-5205685|Reactome: R-RNO-163316|Reactome: R-RNO-5205685	mTERF	35	66	285	mTERF	PF02536.14	-	1	118	10	101	210	297	37.37	1.4e-09	7.6e-14	mTERF
HvmTERF57	superfamily	418649	249	606	5.15033e-20	91.1179	cl19765	mTERF superfamily	-	-	631	Pfam	PF02536	mTERF	467	606	1.7e-15	IPR003690	Transcription termination factor, mitochondrial/chloroplastic	GO:0003690|GO:0006355	Reactome: R-DME-163316|Reactome: R-DME-5205685|Reactome: R-HSA-163316|Reactome: R-HSA-2151201|Reactome: R-HSA-5205685|Reactome: R-HSA-6793080|Reactome: R-MMU-163316|Reactome: R-MMU-5205685|Reactome: R-RNO-163316|Reactome: R-RNO-5205685	mTERF	514	545	0.113	mTERF	PF02536.14	-	463	607	493	606	213	313	56.77	1.7e-15	9.5e-20	mTERF
HvmTERF58	superfamily	418649	57	324	2.9256e-47	161.609	cl19765	mTERF superfamily	-	-	333	Pfam	PF02536	mTERF	16	324	3.8e-54	IPR003690	Transcription termination factor, mitochondrial/chloroplastic	GO:0003690|GO:0006355	Reactome: R-DME-163316|Reactome: R-DME-5205685|Reactome: R-HSA-163316|Reactome: R-HSA-2151201|Reactome: R-HSA-5205685|Reactome: R-HSA-6793080|Reactome: R-MMU-163316|Reactome: R-MMU-5205685|Reactome: R-RNO-163316|Reactome: R-RNO-5205685	mTERF	172	204	0.000207	mTERF	PF02536.14	-	13	324	16	324	4	314	183.81	3.6e-54	2e-58	mTERF
HvmTERF59	superfamily	418649	322	601	3.09548e-15	76.8655	cl19765	mTERF superfamily	-	-	632	Pfam	PF02536	mTERF	466	601	7.2e-15	IPR003690	Transcription termination factor, mitochondrial/chloroplastic	GO:0003690|GO:0006355	Reactome: R-DME-163316|Reactome: R-DME-5205685|Reactome: R-HSA-163316|Reactome: R-HSA-2151201|Reactome: R-HSA-5205685|Reactome: R-HSA-6793080|Reactome: R-MMU-163316|Reactome: R-MMU-5205685|Reactome: R-RNO-163316|Reactome: R-RNO-5205685	mTERF	519	550	0.454	mTERF	PF02536.14	-	452	602	466	601	180	313	54.83	6.6e-15	3.7e-19	mTERF
HvmTERF60	superfamily	418649	82	328	1.59094e-15	76.4803	cl19765	mTERF superfamily	-	-	387	Pfam	PF02536	mTERF	79	353	3.2e-24	IPR003690	Transcription termination factor, mitochondrial/chloroplastic	GO:0003690|GO:0006355	Reactome: R-DME-163316|Reactome: R-DME-5205685|Reactome: R-HSA-163316|Reactome: R-HSA-2151201|Reactome: R-HSA-5205685|Reactome: R-HSA-6793080|Reactome: R-MMU-163316|Reactome: R-MMU-5205685|Reactome: R-RNO-163316|Reactome: R-RNO-5205685	mTERF	96	127	0.0374	mTERF	PF02536.14	-	53	354	77	353	32	313	85.96	2.2e-24	1.2e-28	mTERF

## Sheet: Table S6
Table S6. Consensus motifs of mTERF domains in different species.
Position in the alignment	Consensus motif amino acid frequency within the OsmTERF domain	Consensus motif amino acid frequency within the AtmTERF domain	Consensus motif amino acid frequency within the ZmmTERF domain	Consensus motif amino acid frequency within the HvmTERF domain
1	I(42.43%),L(36.36%),V(21.21%)	I(8.82%),L(50.00%),M(2.94%),V(38.24%)	I(33.33%),L(46.67%),V(20.00%)	I(67.08%),L(23.73%),M(1.69%),V(6.78%)
4	R(33.33%)	R(5.88%)	R(30.00%)	R(59.32%)
8	F(36.36%),I(3.03%),L(51.52%),M(6.06%),T(3.03%)	F(38.24%),L(61.76%)	F(33.33%),I(1%),L(56.67%)	F(20.34%),I(6.78%),L(62.71%),V(10.17%)
14	K(32.26%)	K(64.52%)	K(17.24%)	K(7.14%)
16	A(3.13%),I(37.05%),L(40.63%),M(6.25%),T(3.12%),V(9.37%)	I(58.82%),L(2.94%),M(5.88%),T(20.59%),V(11.78%)	I(40.00%),L(36.67%),T(3.33%),V(20.00%)	C(1.67%),F(1.67%),H(3.33%),I(18.33%),L(46.67%),M(10.00%),S(5.00%),V(13.33%)
20	H(62.05%),Y(12.05%)	H(20.59%),Y(11.77%)	H(43.33%),Y(26.67%)	H(21.67%),Y(60.00%)
21	Y(9.38%)	Y(0.00%)	Y(16.67%)	Y(53.33%)
22	V(40.62%)	V(47.05%)	V(40%)	V(61.67%)
23	A(3.13%),C(3.12%),I(6.25%),L(53.13%),M(9.37%),V(21.88%),Y(3.12%)	C(2.94%),F(2.94%),H(2.94%),I(38.24%),K(2.94%),L(23.53%),M(2.94%),S(2.94%),T(2.94%),V(11.77%),Y(5.88%)	C(6.67%),I(13.33%),L(40.00%),M(20.00%),V(16.67%),Y(3.33%)	A(3.33%),C(1.67%),I(3.33%),L(36.67%),M(11.67%),V(36.66%),Y(6.67%)
24	K(28.13%)	K(47.06%)	K(26.67%)	K (58.33%)
25	F(4.35%)	F(0.00%)	F(15.00%)	F(58.82%)
27	K(27.27%)	K(9.09%)	K(31.58%)	K(62.00%)

## Sheet: Table S7
Table S7. The segmental and tandem duplication events of HvmTERFs.
Location on Barley genome				Location on Barley genome				N	S	Ka	Ks	Ka/Ks	Mya	Duplication type
HvmTERF	Chromosome number	Start	End	HvmTERF	Chromosome number	Start	End
HvmTERF1	chr1H	67112357	67114195	HvmTERF13	chr3H	159806678	159808516	1359.5	476.5	0.0059	0.0109	0.5418	0.838462	segmental
HvmTERF30	chr6H	7952399	7952860	HvmTERF18	chr5H	405735033	405735494	338	121	0.0409	0.0767	0.5337	5.9	segmental
HvmTERF37	chr6H	11904842	11906005	HvmTERF36	chr6H	11895666	11896838	920.3	240.7	0.0869	0.1755	0.4951	13.5	tandem
HvmTERF37	chr6H	11904842	11906005	HvmTERF38	chr6H	11908401	11909570	924.5	236.5	0.122	0.4517	0.2701	34.7462	tandem
HvmTERF38	chr6H	11908401	11909570	HvmTERF36	chr6H	11895666	11896838	922.1	244.9	0.1238	0.387	0.3199	29.7692	tandem
HvmTERF29	chr6H	7946661	7951070	HvmTERF9	chr2H	602566691	602567833	877.3	259.7	0.1802	0.4462	0.4039	34.3231	segmental
HvmTERF22	chr5H	564160234	564161415	HvmTERF25	chr6H	7335214	7336383	891.2	257.8	0.1698	0.3894	0.436	29.9538	segmental
HvmTERF29	chr6H	7946661	7951070	HvmTERF32	chr6H	7988174	7989352	889	254	0.1922	0.4745	0.405	36.5	tandem
HvmTERF9	chr2H	602566691	602567833	HvmTERF34	chr6H	8039159	8040340	891	249	0.2168	0.6295	0.3444	48.4231	segmental
HvmTERF31	chr6H	7983585	7984733	HvmTERF11	chr3H	23033262	23034419	903.5	242.5	0.2138	0.5554	0.385	42.7231	segmental
HvmTERF49	chr6H	512532223	512533374	HvmTERF55	chr7H	85835867	85837048	952.4	187.6	0.4475	2.6214	0.1707	201.646	segmental
HvmTERF26	chr6H	7340384	7340890	HvmTERF25	chr6H	7335214	7336383	369.4	134.6	0.1952	0.3448	0.5662	26.5231	tandem
HvmTERF39	chr6H	11922386	11923546	HvmTERF38	chr6H	11908401	11909570	916.8	241.2	0.2003	0.5565	0.3598	42.8077	tandem
HvmTERF50	chr6H	512551068	512552264	HvmTERF49	chr6H	512532223	512533374	980.8	159.2	0.4943	3.2612	0.1516	250.862	tandem

## Sheet: Table S8
Table S8. The Ka/Ks ratios and estimated divergence time between barley and other five species. (Arabidopsis thaliana, Brachypodium distachyon, Oryza sativa, Vitis vinifera, Zea mays).
Location on barley genome				Location on other species genome					N	S	Ka	Ks	Ka/Ks	Mya
HvmTERFs	Chromosome number	Start	End	Species	Other mTERFs	Chromosome number	Start	End
HvmTERF2	chr1H	420029478	420030971	Arabidopsis thaliana	AT4G02990.1	chr4H	1321758	1324062	1096.4	394.6	0.3331	62.0435	0.0054	4772.58
HvmTERF3	chr1H	420380170	420381357	Arabidopsis thaliana	AT5G07900.1	chr5H	2520164	2521546	878.6	276.4	0.8259	13.7299	0.0602	1056.15
HvmTERF5	chr1H	448870939	448872111	Arabidopsis thaliana	AT5G07900.1	chr5H	2520164	2521546	878.5	264.5	0.9019	13.9606	0.0646	1073.89
HvmTERF7	chr2H	137979819	137983250	Arabidopsis thaliana	AT5G55580.1	chr5H	22515391	22517964	1092.8	338.2	0.3655	66.7029	0.0055	5130.99
HvmTERF8	chr2H	367255469	367260178	Arabidopsis thaliana	AT2G21710.1	chr2H	9270784	9273444	1307.2	450.8	0.3907	22.5577	0.0173	1735.21
HvmTERF14	chr4H	45657504	45658478	Arabidopsis thaliana	AT1G74120.1	chr1H	27871174	27873332	698.5	255.5	0.6391	22.2934	0.0287	1714.88
HvmTERF16	chr4H	359732798	359733739	Arabidopsis thaliana	AT2G36000.1	chr2H	15117015	15119043	615.6	239.4	0.6197	57.8901	0.0107	4453.08
HvmTERF20	chr5H	525376744	525380247	Arabidopsis thaliana	AT1G78930.1	chr1H	29677904	29680757	1282.7	448.3	0.4566	7.3188	0.0624	562.985
HvmTERF21	chr5H	550924292	550925275	Arabidopsis thaliana	AT2G34620.1	chr2H	14577083	14578382	694.4	205.6	0.404	71.5872	0.0056	5506.71
HvmTERF24	chr5H	584492953	584494951	Arabidopsis thaliana	AT4G09620.1	chr4H	6076805	6079151	463.9	157.1	0.4219	64.618	0.0065	4970.62
HvmTERF46	chr6H	345738770	345742148	Arabidopsis thaliana	AT4G14605.1	chr4H	8378428	8380714	1016.6	357.4	0.3734	2.0764	0.1798	159.723
HvmTERF47	chr6H	470248944	470250659	Arabidopsis thaliana	AT3G60400.1	chr3H	22329048	22331338	1223.7	420.3	0.6931	63.1794	0.011	4859.95
HvmTERF51	chr6H	542368585	542370060	Arabidopsis thaliana	AT2G44020.1	chr2H	18217559	18219559	1099.5	358.5	0.2803	66.919	0.0042	5147.62
HvmTERF57	chr7H	177249726	177251621	Arabidopsis thaliana	AT4G19650.1	chr4H	10691674	10695998	1289.9	414.1	0.569	66.8079	0.0085	5139.07
HvmTERF58	chr7H	184503772	184504773	Arabidopsis thaliana	AT4G38160.1	chr4H	17902266	17904330	762.5	227.5	0.3494	24.1327	0.0145	1856.36
HvmTERF59	chr7H	189973008	189974906	Arabidopsis thaliana	AT5G06811.1	chr5H	2110496	2112256	1291.8	436.2	0.6306	8.3173	0.0758	639.792
HvmTERF2	chr1H	420029478	420030971	Brachypodium distachyon	KQK06339	chr2H	24034631	24037316	1157.7	327.3	0.0413	0.3406	0.1212	26.2
HvmTERF3	chr1H	420380170	420381357	Brachypodium distachyon	KQK06341	chr2H	24039797	24041639	925.5	241.5	0.201	0.5951	0.3377	45.7769
HvmTERF4	chr1H	436264991	436266124	Brachypodium distachyon	KQK06260	chr2H	23339353	23343770	913.2	202.8	0.1628	0.7989	0.2038	61.4538
HvmTERF5	chr1H	448870939	448872111	Brachypodium distachyon	KQK14426	chr1H	13090810	13092380	950.6	216.4	0.134	0.5792	0.2314	44.5538
HvmTERF7	chr2H	137979819	137983250	Brachypodium distachyon	KQK15516	chr1H	18784874	18789272	1088.2	399.8	0.0602	0.2528	0.2382	19.4462
HvmTERF7	chr2H	137979819	137983250	Brachypodium distachyon	KQK15517	chr1H	18784874	18789272	1088.2	399.8	0.0602	0.2528	0.2382	19.4462
HvmTERF8	chr2H	367255469	367260178	Brachypodium distachyon	KQK20974	chr1H	56926888	56931094	1337.4	465.6	0.0942	0.3555	0.2651	27.3462
HvmTERF9	chr2H	602566691	602567833	Brachypodium distachyon	KQJ88689	chr4H	23492225	23493892	859.3	277.7	0.2397	0.662	0.3622	50.9231
HvmTERF10	chr2H	650298999	650300141	Brachypodium distachyon	KQJ84866	chr5H	25493788	25494991	953.1	180.9	0.2098	0.9918	0.2116	76.2923
HvmTERF14	chr4H	45657504	45658478	Brachypodium distachyon	KQJ86688	chr4H	6076984	6078752	747.4	212.6	0.091	0.4536	0.2007	34.8923
HvmTERF16	chr4H	359732798	359733739	Brachypodium distachyon	KQK21596	chr1H	61348152	61349829	757.7	163.3	0.0568	1.2361	0.046	95.0846
HvmTERF20	chr5H	525376744	525380247	Brachypodium distachyon	KQJ91473	chr4H	42861188	42866784	1059.4	395.6	0.0541	0.3385	0.1598	26.0385
HvmTERF21	chr5H	550924292	550925275	Brachypodium distachyon	KQK12868	chr1H	4356765	4359046	788.8	120.2	0.1048	1.9021	0.0551	146.315
HvmTERF24	chr5H	584492953	584494951	Brachypodium distachyon	KQK12240	chr1H	1634546	1637585	468.5	182.5	0.1097	0.5624	0.195	43.2615
HvmTERF24	chr5H	584492953	584494951	Brachypodium distachyon	PNT73834	chr1H	1634546	1637585	468.5	182.5	0.1097	0.5624	0.195	43.2615
HvmTERF27	chr6H	7797789	7798946	Brachypodium distachyon	KQJ93425	chr3H	3094810	3096702	880.7	268.3	0.2184	0.6668	0.3276	51.2923
HvmTERF27	chr6H	7797789	7798946	Brachypodium distachyon	PNT65925	chr3H	3094810	3096702	880.7	268.3	0.2184	0.6668	0.3276	51.2923
HvmTERF32	chr6H	7988174	7989352	Brachypodium distachyon	KQJ89046	chr4H	27724627	27728792	878.1	264.9	0.2481	0.7821	0.3172	60.1615
HvmTERF34	chr6H	8039159	8040340	Brachypodium distachyon	KQJ85890	chr4H	1482927	1484445	906.5	248.5	0.238	0.6627	0.3591	50.9769
HvmTERF35	chr6H	8099334	8099873	Brachypodium distachyon	KQJ92810	chr3H	468158	468664	373	131	0.2318	0.477	0.4859	36.6923
HvmTERF45	chr6H	312272572	312273414	Brachypodium distachyon	PNT68891	chr3H	48363038	48363883	644.8	189.2	0.0666	0.5028	0.1325	38.6769
HvmTERF46	chr6H	345738770	345742148	Brachypodium distachyon	KQK00223	chr3H	49326833	49329841	1052.5	399.5	0.0457	0.2959	0.1545	22.7615
HvmTERF47	chr6H	470248944	470250659	Brachypodium distachyon	KQK16187	chr1H	22391699	22394070	1272.9	440.1	0.0795	0.3509	0.2265	26.9923
HvmTERF47	chr6H	470248944	470250659	Brachypodium distachyon	KQK16188	chr1H	22391699	22394070	1272.9	440.1	0.0795	0.3509	0.2265	26.9923
HvmTERF47	chr6H	470248944	470250659	Brachypodium distachyon	PNT75062	chr1H	22391699	22394070	1272.9	440.1	0.0795	0.3509	0.2265	26.9923
HvmTERF47	chr6H	470248944	470250659	Brachypodium distachyon	PNT75063	chr1H	22391699	22394070	1272.9	440.1	0.0795	0.3509	0.2265	26.9923
HvmTERF49	chr6H	512532223	512533374	Brachypodium distachyon	KQK01897	chr3H	58145352	58147512	940.5	193.5	0.2141	0.8152	0.2626	62.7077
HvmTERF50	chr6H	512551068	512552264	Brachypodium distachyon	KQK01898	chr3H	58158793	58160662	1023.7	167.3	0.0739	0.8154	0.0906	62.7231
HvmTERF51	chr6H	542368585	542370060	Brachypodium distachyon	KQK02066	chr3H	58932524	58935963	1170.7	299.3	0.0308	0.4673	0.066	35.9462
HvmTERF51	chr6H	542368585	542370060	Brachypodium distachyon	KQK02067	chr3H	58932524	58935963	1170.7	299.3	0.0308	0.4673	0.066	35.9462
HvmTERF51	chr6H	542368585	542370060	Brachypodium distachyon	PNT69696	chr3H	58932524	58935963	1170.7	299.3	0.0308	0.4673	0.066	35.9462
HvmTERF52	chr7H	85382461	85383633	Brachypodium distachyon	KQK18903	chr1H	43722436	43725429	904.2	247.8	0.1668	0.3765	0.4431	28.9615
HvmTERF52	chr7H	85382461	85383633	Brachypodium distachyon	KQK18904	chr1H	43722436	43725429	904.2	247.8	0.1668	0.3765	0.4431	28.9615
HvmTERF52	chr7H	85382461	85383633	Brachypodium distachyon	PNT76177	chr1H	43722436	43725429	904.2	247.8	0.1668	0.3765	0.4431	28.9615
HvmTERF53	chr7H	85442385	85443554	Brachypodium distachyon	KQK18898	chr1H	43700523	43702277	887.6	279.4	0.143	0.424	0.3373	32.6154
HvmTERF54	chr7H	85722035	85723174	Brachypodium distachyon	KQK18897	chr1H	43695708	43700398	853.9	283.1	0.2008	0.5514	0.3643	42.4154
HvmTERF55	chr7H	85835867	85837048	Brachypodium distachyon	KQK18896	chr1H	43692569	43695511	945.8	233.2	0.0845	0.4475	0.1889	34.4231
HvmTERF58	chr7H	184503772	184504773	Brachypodium distachyon	KQJ98968	chr3H	42231375	42232933	804.1	194.9	0.0615	0.4728	0.1301	36.3692
HvmTERF59	chr7H	189973008	189974906	Brachypodium distachyon	KQJ99019	chr3H	42481546	42484078	1408.9	481.1	0.1657	0.4671	0.3548	35.9308
HvmTERF2	chr1H	420029478	420030971	Oryza sativa	LOC_Os05g33500.1	chr5H	19678142	19680147	1167	321	0.0845	0.6107	0.1384	46.9769
HvmTERF3	chr1H	420380170	420381357	Oryza sativa	LOC_Os05g33460.1	chr5H	19656847	19659937	950	223	0.2599	1.1631	0.2234	89.4692
HvmTERF4	chr1H	436264991	436266124	Oryza sativa	LOC_Os05g34160.1	chr5H	20196728	20198598	966.4	164.6	0.247	1.886	0.131	145.077
HvmTERF5	chr1H	448870939	448872111	Oryza sativa	LOC_Os07g24090.1	chr7H	13654015	13655841	971.1	198.9	0.2466	1.138	0.2167	87.5385
HvmTERF7	chr2H	137979819	137983250	Oryza sativa	LOC_Os07g39430.1	chr7H	23619637	23623178	1107.6	368.4	0.1179	0.48	0.2456	36.9231
HvmTERF8	chr2H	367255469	367260178	Oryza sativa	LOC_Os07g04230.1	chr7H	1856679	1861030	1332	462	0.1352	0.6413	0.2108	49.3308
HvmTERF10	chr2H	650298999	650300141	Oryza sativa	LOC_Os04g54510.1	chr4H	32424166	32425618	954.7	179.3	0.2024	0.8896	0.2275	68.4308
HvmTERF14	chr4H	45657504	45658478	Oryza sativa	LOC_Os12g30610.1	chr12H	18383645	18385743	764.3	189.7	0.1957	0.7396	0.2647	56.8923
HvmTERF15	chr4H	69204517	69205677	Oryza sativa	LOC_Os11g09990.1	chr11H	5357710	5359379	899	247	0.3201	0.8334	0.3842	64.1077
HvmTERF16	chr4H	359732798	359733739	Oryza sativa	LOC_Os03g24590.1	chr3H	14006155	14007356	725.7	156.3	0.0898	1.5408	0.0583	118.523
HvmTERF20	chr5H	525376744	525380247	Oryza sativa	LOC_Os09g38720.1	chr9H	22255999	22259924	1290.5	464.5	0.1408	0.5727	0.2459	44.0538
HvmTERF21	chr5H	550924292	550925275	Oryza sativa	LOC_Os03g57149.1	chr3H	32590196	32591451	806.4	108.6	0.0881	1.0551	0.0835	81.1615
HvmTERF24	chr5H	584492953	584494951	Oryza sativa	LOC_Os03g62240.1	chr3H	35253134	35254202	472.3	169.7	0.191	0.9372	0.2038	72.0923
HvmTERF45	chr6H	312272572	312273414	Oryza sativa	LOC_Os02g36780.1	chr2H	22180171	22181019	662.1	168.9	0.1112	1.2564	0.0885	96.6462
HvmTERF46	chr6H	345738770	345742148	Oryza sativa	LOC_Os02g39040.1	chr2H	23575780	23578282	1047.6	407.4	0.1027	0.4705	0.2183	36.1923
HvmTERF47	chr6H	470248944	470250659	Oryza sativa	LOC_Os07g22670.1	chr7H	12772240	12774286	1274.3	438.7	0.1404	0.539	0.2605	41.4615
HvmTERF50	chr6H	512551068	512552264	Oryza sativa	LOC_Os02g51450.1	chr2H	31520983	31523070	1020.7	164.3	0.1122	0.6057	0.1852	46.5923
HvmTERF51	chr6H	542368585	542370060	Oryza sativa	LOC_Os02g54200.1	chr2H	33224445	33227590	1140.7	314.3	0.0672	0.6595	0.1019	50.7308
HvmTERF54	chr7H	85722035	85723174	Oryza sativa	LOC_Os06g12080.1	chr6H	6472151	6473692	867	255	0.2791	0.7585	0.368	58.3462
HvmTERF55	chr7H	85835867	85837048	Oryza sativa	LOC_Os06g12100.1	chr6H	6479283	6480980	959	214	0.1505	0.8947	0.1682	68.8231
HvmTERF58	chr7H	184503772	184504773	Oryza sativa	LOC_Os08g40430.1	chr8H	25588052	25590594	812.5	186.5	0.0802	0.5881	0.1364	45.2385
HvmTERF59	chr7H	189973008	189974906	Oryza sativa	LOC_Os08g40630.1	chr8H	25719255	25721977	1375.6	490.4	0.2416	0.8223	0.2938	63.2538
HvmTERF2	chr1H	420029478	420030971	Vitis vinifera	VIT_07s0104g00720.t01	chr7H	1887719	1890896	1088.3	393.7	0.3091	61.8859	0.005	4760.45
HvmTERF3	chr1H	420380170	420381357	Vitis vinifera	VIT_07s0005g03840.t01	chr7H	6844159	6845397	868.3	286.7	0.7816	10.0943	0.0774	776.485
HvmTERF5	chr1H	448870939	448872111	Vitis vinifera	VIT_05s0020g01640.t01	chr5H	3347711	3349085	880.3	277.7	0.8187	8.3696	0.0978	643.815
HvmTERF7	chr2H	137979819	137983250	Vitis vinifera	VIT_19s0090g01770.t01	chr19H	7803566	7814243	1021.6	313.4	0.3666	69.8043	0.0053	5369.56
HvmTERF8	chr2H	367255469	367260178	Vitis vinifera	VIT_03s0063g02590.t01	chr3H	5802713	5806849	1154.9	444.1	0.3085	8.7622	0.0352	674.015
HvmTERF14	chr4H	45657504	45658478	Vitis vinifera	VIT_17s0000g05130.t01	chr17H	5627923	5629396	685	248	0.5802	61.1088	0.0095	4700.68
HvmTERF16	chr4H	359732798	359733739	Vitis vinifera	VIT_08s0007g02500.t01	chr8H	16616945	16618303	667.1	208.9	0.583	25.9877	0.0224	1999.05
HvmTERF20	chr5H	525376744	525380247	Vitis vinifera	VIT_09s0054g01030.t01	chr9H	21891991	21897453	1261	464	0.3974	3.5422	0.1122	272.477
HvmTERF21	chr5H	550924292	550925275	Vitis vinifera	VIT_10s0003g04040.t01	chr10H	6867305	6869411	757.5	211.5	0.3594	75.0762	0.0048	5775.09
HvmTERF24	chr5H	584492953	584494951	Vitis vinifera	VIT_18s0072g01130.t01	chr18H	20729017	20735163	465.1	170.9	0.4702	60.7409	0.0077	4672.38
HvmTERF26	chr6H	7340384	7340890	Vitis vinifera	VIT_07s0104g01530.t01	chr7H	2513219	2514096	353.1	108.9	0.8053	68.0784	0.0118	5236.8
HvmTERF46	chr6H	345738770	345742148	Vitis vinifera	VIT_14s0171g00230.t01	chr14H	26071428	26073639	1038.4	371.6	0.3734	2.015	0.1853	155
HvmTERF47	chr6H	470248944	470250659	Vitis vinifera	VIT_15s0021g01920.t01	chr15H	12603621	12605692	1210.7	427.3	0.7198	61.8549	0.0116	4758.07
HvmTERF50	chr6H	512551068	512552264	Vitis vinifera	VIT_07s0031g01450.t01	chr7H	17541013	17543650	843.1	236.9	0.7985	73.1463	0.0109	5626.64
HvmTERF51	chr6H	542368585	542370060	Vitis vinifera	VIT_11s0016g02240.t01	chr11H	1835708	1837177	1074.5	365.5	0.249	64.9272	0.0038	4994.4
HvmTERF57	chr7H	177249726	177251621	Vitis vinifera	VIT_10s0042g01260.t01	chr10H	15271381	15273165	1187	379	0.4579	4.2687	0.1073	328.362
HvmTERF58	chr7H	184503772	184504773	Vitis vinifera	VIT_03s0038g04180.t01	chr3H	3030695	3032099	731.8	261.2	0.3585	5.5093	0.0651	423.792
HvmTERF59	chr7H	189973008	189974906	Vitis vinifera	VIT_08s0007g06290.t01	chr8H	20070508	20072280	1311	438	0.5287	7.4281	0.0712	571.392
HvmTERF2	chr1H	420029478	420030971	Zea Mays	Zm00001d010340_P001	chr8H	110435824	110437308	1115	352	0.0951	0.8509	0.1118	65.4538
HvmTERF3	chr1H	420380170	420381357	Zea Mays	Zm00001d038158_P001	chr6H	149857328	149858539	943	230	0.3397	1.2889	0.2636	99.1462
HvmTERF5	chr1H	448870939	448872111	Zea Mays	Zm00001d050234_P001	chr4H	75106267	75107484	935.1	207.9	0.3305	1.5375	0.215	118.269
HvmTERF7	chr2H	137979819	137983250	Zea Mays	Zm00001d006700_P001	chr2H	214673600	214677670	1084.8	379.2	0.1163	0.5844	0.199	44.9538
HvmTERF8	chr2H	367255469	367260178	Zea Mays	Zm00001d018756_P001	chr7H	4290052	4307739	1306.6	481.4	0.1368	0.6558	0.2085	50.4462
HvmTERF14	chr4H	45657504	45658478	Zea Mays	Zm00001d041537_P001	chr3H	126166316	126167305	773.2	198.8	0.2173	0.9945	0.2185	76.5
HvmTERF15	chr4H	69204517	69205677	Zea Mays	Zm00001d034669_P001	chr1H	299321980	299323654	867.9	272.1	0.4117	1.3612	0.3025	104.708
HvmTERF16	chr4H	359732798	359733739	Zea Mays	Zm00001d029242_P001	chr1H	63479560	63480471	714	162	0.1619	1.5239	0.1062	117.223
HvmTERF20	chr5H	525376744	525380247	Zea Mays	Zm00001d021376_P001	chr7H	150246031	150250848	1258.5	475.5	0.1631	0.6967	0.2341	53.5923
HvmTERF20	chr5H	525376744	525380247	Zea Mays	Zm00001d027230_P001	chr1H	44289	49837	1267.4	481.6	0.1625	0.6895	0.2357	53.0385
HvmTERF24	chr5H	584492953	584494951	Zea Mays	Zm00001d034784_P001	chr1H	302249936	302255526	506.1	162.9	0.3264	1.1963	0.3025	92.0231
HvmTERF45	chr6H	312272572	312273414	Zea Mays	Zm00001d050886_P001	chr4H	128466573	128467412	644.5	186.5	0.1499	1.5529	0.0965	119.454
HvmTERF46	chr6H	345738770	345742148	Zea Mays	Zm00001d017130_P001	chr5H	186476548	186479329	1065.6	389.4	0.1306	0.8748	0.1493	67.2923
HvmTERF47	chr6H	470248944	470250659	Zea Mays	Zm00001d021513_P001	chr7H	154682758	154684482	1263	444	0.2162	0.8886	0.2433	68.3538
HvmTERF49	chr6H	512532223	512533374	Zea Mays	Zm00001d042436_P001	chr3H	167171083	167172249	944.4	195.6	0.3179	1.0902	0.2916	83.8615
HvmTERF51	chr6H	542368585	542370060	Zea Mays	Zm00001d052081_P001	chr4H	178936233	178939151	1147.4	316.6	0.0631	0.799	0.079	61.4615
HvmTERF53	chr7H	85442385	85443554	Zea Mays	Zm00001d015585_P001	chr5H	99710472	99711659	899	268	0.4105	1.1697	0.351	89.9769
HvmTERF55	chr7H	85835867	85837048	Zea Mays	Zm00001d006629_P001	chr2H	212952452	212953621	905.4	252.6	0.15	1.037	0.1446	79.7692
HvmTERF58	chr7H	184503772	184504773	Zea Mays	Zm00001d049743_P001	chr4H	42447381	42459199	837.3	161.7	0.1121	0.7151	0.1568	55.0077
HvmTERF59	chr7H	189973008	189974906	Zea Mays	Zm00001d031533_P001	chr1H	193316763	193318712	1408.1	481.9	0.3095	1.2693	0.2438	97.6385

## Sheet: Table S9
Table S9. Characteristics of cis-acting regulatory elements in the promoter regions of the HvmTERF genes.
Type	Element	Sequence	Annotation	Total number	HvmTERF1	HvmTERF2	HvmTERF3	HvmTERF4	HvmTERF5	HvmTERF6	HvmTERF7	HvmTERF8	HvmTERF9	HvmTERF10	HvmTERF11	HvmTERF12	HvmTERF13	HvmTERF14	HvmTERF15	HvmTERF16	HvmTERF17	HvmTERF18	HvmTERF19	HvmTERF20	HvmTERF21	HvmTERF22	HvmTERF23	HvmTERF24	HvmTERF25	HvmTERF26	HvmTERF27	HvmTERF28	HvmTERF29	HvmTERF30	HvmTERF31	HvmTERF32	HvmTERF33	HvmTERF34	HvmTERF35	HvmTERF36	HvmTERF37	HvmTERF38	HvmTERF39	HvmTERF40	HvmTERF41	HvmTERF42	HvmTERF43	HvmTERF44	HvmTERF45
Development/tissue specificity	AC-I	(T/C)C(T/C)(C/T)ACC(T/C)ACC	element conferring enhanced xylem expression and repressed phloem expression	1	-	-	-	-	-	-	-	-	-	-	-	-	-	-	-	-	-	-	-	-	-	-	-	1	-	-	-	-	-	-	-	-	-	-	-	-	-	-	-	-	-	-	-	-	-
	AC-II	TCACCAACCCCC	AC-II confers enhanced xylem expression and repressed phloem	1	-	-	-	1	-	-	-	-	-	-	-	-	-	-	-	-	-	-	-	-	-	-	-	-	-	-	-	-	-	-	-	-	-	-	-	-	-	-	-	-	-	-	-	-	-
	CAT-box	GCCACT	Element involved in meristem expression	32	-	-	-	-	-	-	-	1	1	-	-	-	-	-	-	1	-	3	2	1	-	1	-	1	3	-	-	-	1	-	-	-	-	-	-	1	1	1	2	-	-	-	2	-	-
	CCGTCC-box	CCGTCC	related to meristem specific activation of a histone H4 (H4A748) gene	40	1	2	1	1	-	-	-	-	1	3	-	-	1	-	1	1	1	1	-	-	-	1	1	-	3	-	-	-	-	-	1	2	-	-	2	1	-	1	1	-	1	-	2	-	3
	dOCT	CaCGGATC	cis-acting regulatory element related to meristem specific activation	6	-	-	-	-	-	-	-	-	-	-	-	-	-	-	-	-	-	1	-	1	-	-	-	-	-	-	1	-	1	-	-	-	-	-	-	-	-	-	-	-	-	1	-	-	-
	GCN4_motif	CAAGCCA	Endosperm expression	3	-	-	-	-	-	-	-	-	-	-	-	-	-	-	-	-	-	-	-	-	-	-	-	-	-	-	2	-	-	-	-	-	-	-	-	-	-	-	-	-	-	-	-	-	1
	MSA-like	TCCAACGGT / T/C)C(T/C)AACGG(T/C)(T/C)A	cis-acting element involved in cell cycle regulation	4	-	-	-	-	-	-	-	-	1	-	1	-	-	-	-	-	-	-	-	-	-	-	-	-	2	-	-	-	-	-	-	-	-	-	-	-	-	-	-	-	-	-	-	-	-
	circadian	CAANNNNATC	cis-acting regulatory element involved in circadian control	11	-	-	-	-	-	1	1	-	-	-	-	-	-	-	-	1	-	-	-	-	-	-	-	-	-	-	-	-	-	-	-	-	-	-	-	-	1	-	2	-	-	1	-	1	-
	O2-site	GATGATATGG/ GTTGACGTGA	cis-acting regulatory element involved in zein metabolism regulation	0	-	-	-	-	-	-	-	-	-	-	-	-	-	-	-	-	-	-	-	-	-	-	-	-	-	-	-	-	-	-	-	-	-	-	-	-	-	-	-	-	-	-	-	-	-
Light responsiveness	ACE	ACGTGGA/ AAAACGTTTA	cis-acting element involved in light responsiveness	8	-	-	-	-	-	-	-	1	-	1	-	-	-	-	-	-	1	-	-	-	-	-	-	-	-	-	-	-	-	-	-	1	-	-	-	-	-	-	-	-	-	-	-	-	-
	AE-box	AGAAACAA/ AGAAACTT	part of a system composed of 3 to 4 Gap-boxes and 2 AE-boxes; conferring light responsiveness	12	-	-	-	-	-	1	1	-	-	-	-	-	-	-	-	-	-	-	1	1	-	-	-	-	-	-	-	-	-	-	1	-	-	-	-	-	-	-	-	-	-	2	1	1	-
	ATC-motif	GCCAATCC	part of a conserved DNA module involved in light responsiveness	4	-	-	-	-	-	-	-	-	-	-	-	-	-	-	-	-	-	-	-	-	-	-	-	-	-	-	-	-	-	-	-	-	-	-	-	-	-	-	-	-	-	1	-	-	-
	ATCT-motif	AATCTAATCC	part of the gapA conserved DNA module array (gapA-CMA1) involved with light responsiveness	8	1	-	-	-	-	-	-	-	-	-	-	-	-	-	-	-	-	-	1	-	-	-	-	-	-	-	-	-	-	-	-	-	1	-	-	-	1	-	-	1	-	-	2	-	-
	Box III	CATTTACACT	identified as a candidate box on the based of homology with rbcs genes (not shown to be active), involved in light responsiveness	0	-	-	-	-	-	-	-	-	-	-	-	-	-	-	-	-	-	-	-	-	-	-	-	-	-	-	-	-	-	-	-	-	-	-	-	-	-	-	-	-	-	-	-	-	-
	GA-motif	AAGGAAGA	part of a light responsive element	8	-	-	-	-	-	-	-	-	-	-	-	-	-	1	-	-	1	-	-	-	-	-	-	-	1	-	-	-	-	-	1	-	-	-	-	-	-	-	-	1	1	1	-	-	-
	Gap-box	AAATGGAGA	light responsiveness	1	-	-	-	-	-	-	-	-	-	-	-	-	-	-	-	-	-	-	-	-	-	-	-	-	-	-	-	-	-	-	-	-	-	-	-	-	-	-	-	1	-	-	-	-	-
	G-box	CACGTT / CACGTC	cis-acting regulatory element involved in light responsiveness	113	2	2	3	2	2	2	4	1	3	-	2	2	-	3	-	2	3	1	-	-	2	-	3	3	1	2	4	7	1	1	-	2	1	-	3	2	1	2	2	3	3	-	-	2	4
	GATA-motif	AAGGATAAGG	Light responsive element	24	-	1	-	-	-	1	-	3	-	-	-	-	-	2	-	-	-	-	-	-	-	-	-	-	-	-	-	3	-	-	1	-	-	1	-	-	-	-	-	1	-	1	1	-	1
	GT10motif	GGTTAA	light responsive element	0
	I-box	cGATAAGGCG	part of a light responsive element	25	-	-	1	-	-	-	1	4	-	1	-	-	1	2	-	1	-	-	-	-	-	1	-	1	-	-	-	1	-	-	-	-	-	-	-	-	-	-	-	1	1	-	-	-	-
	L-box	TCTCACCAACC	part of the pal conserved DNA module array (pal-CMA1) involved with light responsiveness	0	-	-	-	-	-	-	-	-	-	-	-	-	-	-	-	-	-	-	-	-	-	-	-	-	-	-	-	-	-	-	-	-	-	-	-	-	-	-	-	-	-	-	-	-	-
	Sp1	CC(G/A)CCC	light responsive element	64	1	2	1	1	1	-	-	-	2	3	1	1	-	4	5	5	-	1	-	-	1	1	-	1	1	-	1	1	1	-	1	-	1	-	-	-	-	1	-	-	2	-	2	-	-
	TCCC-motif	TCTCCCT	part of a light responsive element	17	1	-	-	-	1	-	-	-	-	-	-	-	1	1	-	1	-	1	-	-	2	-	-	-	-	-	-	1	-	-	-	-	-	1	-	1	-	-	-	1	1	-	2	-	-
	TC-rich repeats	TCTTAC	part of the gapB conserved DNA module array (gapB-CMA1) involved with light responsiveness	0	-	-	-	-	-	-	-	-	-	-	-	-	-	-	-	-	-	-	-	-	-	-	-	-	-	-	-	-	-	-	-	-	-	-	-	-	-	-	-	-	-	-	-	-	-
	TCT-motif	TCTTAC	part of the gapB conserved DNA module array (gapB-CMA1) involved with light responsiveness	32	-	2	-	-	-	-	-	-	2	-	-	-	1	1	-	-	-	-	1	5	-	-	-	-	-	1	1	1	1	-	2	1	-	1	1	1	2	-	1	-	-	-	-	-	2
Stress	LTR	CCGAAA	cis-acting element involved in low-temperature responsiveness	29	-	1	1	-	-	-	1	-	1	-	-	-	-	-	-	-	2	2	-	-	-	-	-	1	-	1	1	-	-	-	-	1	-	-	-	3	1	-	-	-	2	3	-	-	-
	Wun-motif	AAATTTCCT	wound-responsive element	8	-	1	-	-	-	1	-	-	-	-	1	-	-	-	-	-	-	-	-	-	-	-	-	-	-	1	-	-	-	-	-	2	-	-	-	-	-	-	-	-	-	-	-	-	-
	GC-motif	CCCCCG	Anoxic-speciﬁc inducibility	53	-	-	1	1	1	1	1	2	-	2	-	-	-	2	1	1	-	1	-	-	-	1	-	2	-	-	-	-	-	1	-	-	2	-	1	3	-	-	-	-	1	-	-	1	-
	MBS	CAACTG	MYB binding site involved in drought-inducibility	38	3	-	1	2	-	2	-	-	2	-	1	-	1	-	-	-	-	1	1	-	-	-	-	1	-	-	1	-	1	1	1	1	-	1	1	1	-	-	1	-	-	-	2	2	1
	ARE	TGGTTT	cis-acting regulatory element essential for the anaerobic induction	51	-	1	2	1	-	-	3	-	-	-	3	2	-	-	-	-	1	-	3	2	-	-	1	1	1	1	-	-	3	-	1	1	1	1	2	-	1	-	1	2	-	1	1	3	-
Hormone response	ABRE	TACGTG/ CACGTG	cis-acting element involved in the abscisic acid responsiveness on the rd29B and cor15a genes	146	1	3	4	-	2	2	8	3	2	-	-	2	-	3	2	3	4	1	-	1	2	-	4	3	3	-	3	5	-	2	-	-	5	-	5	3	1	2	4	4	2	-	1	3	3
	AuxRR-core	GGTCCAT	cis-acting regulatory element involved in auxin responsiveness	9	-	-	-	-	1	-	-	1	-	-	-	-	-	-	-	-	-	-	-	-	-	-	-	-	-	-	-	1	-	-	-	-	-	1	-	-	-	-	-	-	-	-	-	1	-
	CGTCA-motif	CGTCA	cis-acting regulatory element involved in the MeJA-responsiveness	123	1	1	3	2	3	2	3	5	2	2	-	3	1	4	1	1	3	3	2	2	3	-	2	6	-	-	5	1	1	2	2	2	2	2	4	2	-	1	1	2	3	1	-	2	3
	ERE	ATTTCAAA	ethylene-responsive element probably involved in petal senescence	24	-	1	-	-	-	1	2	-	-	-	-	1	-	-	1	-	1	1	-	1	2	-	-	-	-	4	1	1	-	-	-	-	-	-	-	-	-	-	1	2	-	-	-	-	-
	GARE-motif	AAACAGA/ TCTGTTG	gibberellin-responsive element	13	-	-	-	1	-	1	-	-	-	-	-	-	2	-	2	-	-	-	1	1	-	-	1	-	1	-	-	-	-	-	-	-	-	-	-	-	-	1	-	-	-	-	-	-	-
	P-box	CCTTTTG	gibberellin-responsive element	11	-	1	-	-	-	-	-	2	-	-	-	-	-	-	-	-	1	-	2	-	-	-	-	1	-	-	-	1	-	-	-	-	-	-	-	-	1	-	-	-	-	-	-	-	-
	TATC-box	TATCCCA	cis-acting element involved in gibberellin-responsiveness	11	1	-	-	-	-	-	1	1	-	-	-	-	-	-	-	-	-	-	1	-	-	-	-	-	-	-	-	-	-	-	-	-	-	1	-	-	-	-	-	1	-	-	1	1	-
	TCA-element	GAGAAGAATA	cis-acting element involved in salicylic acid responsiveness	23	1	-	-	-	-	-	5	-	-	1	1	-	-	-	-	1	1	1	-	-	-	-	-	-	1	-	-	-	1	-	-	-	1	-	-	1	-	-	-	-	-	2	-	-	-
	TGACG-motif	TGACG	cis-acting regulatory element involved in the MeJA-responsiveness	123	1	1	3	2	3	2	3	5	2	2	-	3	1	4	1	1	3	3	2	2	3	-	2	6	-	-	5	1	1	2	2	2	2	2	4	2	-	1	1	2	3	1	-	2	3
	TGA-element	AACGAC	Part of auxin-responsive element	37	-	-	1	-	-	1	1	-	4	-	-	1	3	3	-	1	-	-	1	-	-	1	-	-	1	-	1	1	-	3	-	-	-	-	-	3	2	1	-	-	1	-	-	-	2
[truncated: 15 more columns]

## Sheet: Table S10
Table S10. List of putative miRNAs targeted to HvmTERF genes identified by psRNATarget online tool.
miRNA accession	Target accession	Expectation	Inhibition	miRNA start	miRNA end	Target start	Target end	miRNA aligned fragment	Target aligned fragment	Target description
bdi-miR160a-3p	HvmTERF3	3	Cleavage	1	21	442	462	GCGUGCGAGGAGCCAAGCAUG	GAGCCUUUGCUCCUCGCACGC	inside mTERF domain
bdi-miR7717b-5p	HvmTERF19	3	Cleavage	1	24	1014	1037	UCUAAGACGACUGAGAAAUAACUA	GAGUUAUUUAUCAGUUGUCUUGGC	inside mTERF domain
hvu-miR6192	HvmTERF46	3	Cleavage	1	22	86	107	UAGGAGAGGGGGGAAGGGAUCU	UCGUCCUCUCCCCCUUCUCCUC	upstream mTERF domain
hvu-miR6192	HvmTERF22	3	Cleavage	1	22	57	78	UAGGAGAGGGGGGAAGGGAUCU	UCCUUCCAUCUCCCCUCUCCUC	upstream mTERF domain
hvu-miR6192	HvmTERF22	3	Cleavage	1	22	96	117	UAGGAGAGGGGGGAAGGGAUCU	UCCUUCCAUCUCCCCUCUCCUC	upstream mTERF domain
tae-miR9662a-3p	HvmTERF35	3	Translation	1	21	66	86	UUGAACAUCCCAGAGCCACCG	CCGUGGCUCUGCAAUGUUCAA	inside mTERF domain
tae-miR9662a-3p	HvmTERF34	3	Translation	1	21	690	710	UUGAACAUCCCAGAGCCACCG	CCGUGGCUCUGCAAUGUUCAA	inside mTERF domain
tae-miR9662a-3p	HvmTERF19	3	Cleavage	1	21	684	704	UUGAACAUCCCAGAGCCACCG	CCGCGGCUCCGGGAUGUUCAG	inside mTERF domain
tae-miR9662a-3p	HvmTERF37	3	Cleavage	1	21	690	710	UUGAACAUCCCAGAGCCACCG	CAGGGGCUCUGGUAUGUUCAG	inside mTERF domain
tae-miR9662a-3p	HvmTERF39	3	Cleavage	1	21	687	707	UUGAACAUCCCAGAGCCACCG	CAGGGGCUCUGGUAUGUUCAG	inside mTERF domain
tae-miR9662a-3p	HvmTERF36	3	Cleavage	1	21	699	719	UUGAACAUCCCAGAGCCACCG	CAGGGGCUCUGGUAUGUUCAG	inside mTERF domain
tae-miR9662b-3p	HvmTERF60	3	Cleavage	1	21	689	709	UGAACAUCCCAGAGCCACCGG	CCCGUUACUCUGGGAUGUUCA	inside mTERF domain

[truncated: 5 more sheets: Table S11, Table S12, Table S13, Table S14, Table S15]
